# Supplementary material for: Modulating polyolefin properties through the incorporation of nitrogen-containing polar monomers
Source: Royal Society of Chemistry journal article supplement (doi:10.1039/c7py00127d), 2017-01-01
Supplement: c7py00127d1.pdf [file c7py00127d1.pdf]

# Modulating the Polyolefin Properties through the Incorporation of Nitrogen-Containing Polar Monomers

Yinna Na, Dan Zhang, Changle Chen\*

*CAS Key Laboratory of Soft Matter Chemistry, iChEM (Collaborative Innovation Center of Chemistry for Energy Materials), Department of Polymer Science and Engineering, University of Science and Technology of China, Hefei, 230026, China*

## Table of Contents

|                                 |    |
|---------------------------------|----|
| 1. Experimental Section .....   | 2  |
| 2. Spectra data .....           | 4  |
| 2.1 NMR, ESI-MS spectra.....    | 4  |
| 2.2 DSC, GPC of copolymer. .... | 20 |
| 3. References .....             | 44 |

## 1. Experimental Section

**General Considerations.** All experiments were carried out under a dry Nitrogen atmosphere using standard Schlenk techniques or in a glove-box. Deuterated solvents used for NMR were dried and distilled prior to use.  $^1\text{H}$ ,  $^{13}\text{C}$  NMR spectra were recorded by a Bruker Ascend Tm 400 spectrometer at ambient temperature unless otherwise stated. The chemical shifts of the  $^1\text{H}$  and  $^{13}\text{C}$  NMR spectra were referenced to the residual solvent; Coupling constants are in Hz. Molecular weight and molecular weight distribution of the polymer were determined by gel permeation chromatography (GPC) with a PL 210 equipped with one Shodex AT-803S and two Shodex AT-806MS columns at 150 °C using o-dichlorobenzene as a solvent and calibrated with polystyrene standards. Water contact angles on polymer films were measured with Contact Angle Meter SL200B (Solon Tech. Co., Ltd.) by the dynamic sessile drop method.

**Preparation of PO-Pd.** The phosphine sulfonate ligand<sup>1</sup> (1.0 g, 2.0 mmol) was suspended in THF (16 mL).  $\text{Pd}(\text{tmeda})\text{Me}_2$  (550 mg, 2.1 mmol) was added at -5 °C. After stirring for 5 min, the evolution of gas stopped and the suspension turned clear. The solution was stirred overnight. The resulting white precipitate was filtered, washed with  $\text{Et}_2\text{O}$  and dried under reduced pressure to yield the tmeda-bridged dimer. The dimer was dispersed in 20 mL DMSO at room temperature. The solvent was removed under reduced pressure at 80 °C. The dimer complex is only slightly soluble in DMSO, therefore complete dissolution of the solid indicate complete conversion of the starting material. After removal of DMSO under reduced pressure, the resulting solid was dispersed in  $\text{Et}_2\text{O}$ , and isolated by filtration to yield a white solid (800 mg, 60%).  $^1\text{H}$  NMR ( $\text{CDCl}_3$ , 400 MHz):  $\delta$  8.31 (s, 1H), 7.60-7.55 (m, 3H), 7.43-7.29 (m, 8H), 7.24-7.22 (m, 2H), 3.73 (s, 3H, OMe), 2.85 (s, 6H, DMSO), 2.70 (s, 3H, OMe), 0.56 (s, 3H, Pd-Me).  $^{13}\text{C}$  NMR (100 MHz,  $\text{CDCl}_3$ ):  $\delta$  158.3 (s), 157.9 (s), 149.1 (d,  $J_{\text{PC}} = 14$  Hz), 142.5 (d,  $J_{\text{PC}} = 18$  Hz), 136.3 (s), 135.1 (d,  $J_{\text{PC}} = 9$  Hz), 134.7(s), 133.7 (d,  $J_{\text{PC}} = 10$  Hz), 131.8 (s), 131.1 (s), 130.5 (d,  $J_{\text{PC}} = 7\text{Hz}$ ), 129.0 (br), 128.9 (br), 128.8 (br), 128.7(br), 128.5 (br), 127.1 (d,  $J_{\text{PC}} = 8$  Hz), 118.0 (s), 104.2 (s), 103.8 (s), 56.0 (s, OMe), 54.6 (s, OMe), 41.6 (br, DMSO), 4.1 (s, Pd-Me).  $^{31}\text{P}$  NMR ( $\text{DMSO}-d_6$ ):  $\delta$  15.4. Anal. Calcd. for  $\text{C}_{29}\text{H}_{31}\text{O}_6\text{PPdS}_2$ : C, 51.44; H, 4.62. Found: C, 51.49; H, 4.60.

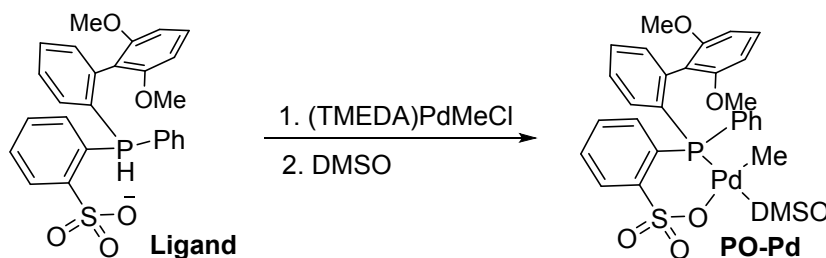

**Procedure for copolymerization.** In a typical experiment, a 350 mL glass thick-walled pressure vessel was charged with chlorobenzene, a desired amount of comonomer and a magnetic stir bar in the glovebox. The pressure vessel was connected to a high pressure line and the solution was degassed. The vessel was warmed to the desired temperature using an oil bath and allowed to equilibrate for 5 min. The metal complex in 2 mL  $\text{CH}_2\text{Cl}_2$  was injected into the polymerization system via syringe. With rapid stirring, the reactor was pressurized, maintained at a desired of ethylene, and stirred continuously for the desired time. The pressure vessel was vented, the polymerization was quenched via the addition of MeOH (5 mL) and the polymer was precipitated using excess MeOH. After filtration, the copolymer was obtained and dried at 80 °C for 24 h under vacuum. The polar monomer incorporation (mol %) was calculated from  $^1\text{H}$  NMR analysis.

**Procedure for terpolymerization.** In a typical experiment, a 350 mL glass thick-walled pressure vessel was charged with chlorobenzene, a desired amount of two comonomers and a magnetic stir bar in the glovebox. The pressure vessel was connected to a high pressure line and the solution was degassed. The vessel was warmed to the desired temperature using an oil bath and allowed to equilibrate for 5 min. The metal complex in 2 mL  $\text{CH}_2\text{Cl}_2$  was injected into the polymerization system via syringe. With rapid stirring, the reactor was pressurized, maintained at a desired of ethylene, and stirred continuously for the desired time. The pressure vessel was vented, the polymerization was quenched via the addition of MeOH (5 mL) and the polymer was precipitated using excess MeOH. After filtration, the terpolymer was obtained and dried at 80 °C for 24 h under vacuum. The polar monomer incorporation (mol %) was calculated from  $^1\text{H}$  NMR analysis.

**Water contact angle measurement.** Water contact angles on polymer films were measured with Contact Angle Meter SL200B (Solon Tech. Co., Ltd.) by the dynamic sessile drop method. Samples for water contact angle measurements were prepared by the evaporation of 3 to 5 % (w/w) solutions in toluene onto glass slides under ambient conditions. The solvent was evaporated on top of a glass slide for 10 minutes, and a second layer of the polymer solution was then applied in order to make the film thicker. The water contact angles of the polymer thin films were measured using a contact angle goniometer at 25 °C with an accuracy of  $\pm 3^\circ$ . The reported values are the average of at least six measurements made at different positions of the film.

**Mechanical properties of the polyethylene sample.** Standard test method ASTM 638 was followed to measure the mechanical properties of the polyethylene sample. Polymers were melt-pressed at 30 to 35°C above their melting point to obtain the test specimens. The test specimens had 28-mm gauge length, 3-mm width, and thickness of 1 mm. Stress/strain experiments were performed at 10 m/min by means of

a Universal Test Machine (UTM2502) at room temperature. At least three specimens of each copolymer were tested.

**Stoichiometric insertion studies.** The insertion of NB-NP and NP into the Pd–Me bond of palladium complex Pd was monitored by  $^1\text{H}$  NMR under pseudo first order conditions. General procedure: About 5  $\mu\text{mol}$  of **PO-Pd** was dissolved in 0.5 mL of  $\text{CD}_2\text{Cl}_2$ . About 5 equivalents of monomer were added, the NMR tube was sealed.  $^1\text{H}$  NMR spectra were recorded periodically at 20  $^\circ\text{C}$ . The decrease of the resonances for **PO-Pd** complex and the increase of a new set of species could be clearly observed.

## 2. Spectra data

### 2.1 NMR spectra

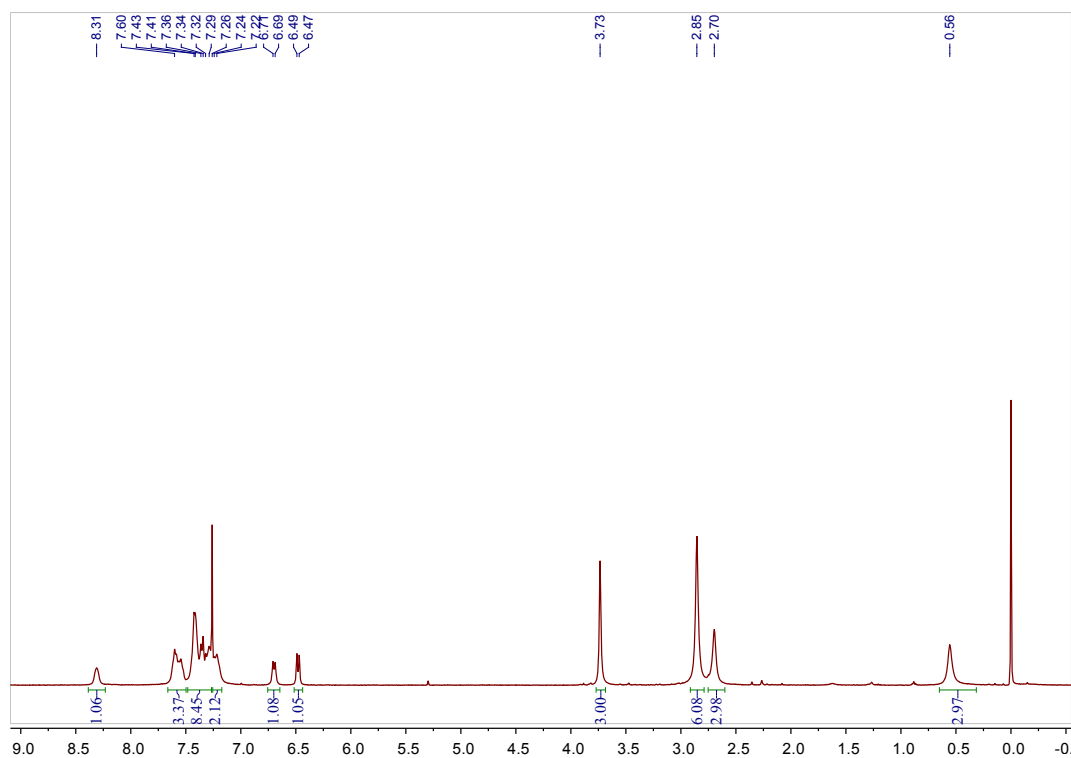

**Figure S1.**  $^1\text{H}$  NMR spectrum (400 MHz,  $\text{CDCl}_3$ ) of **PO-Pd**.

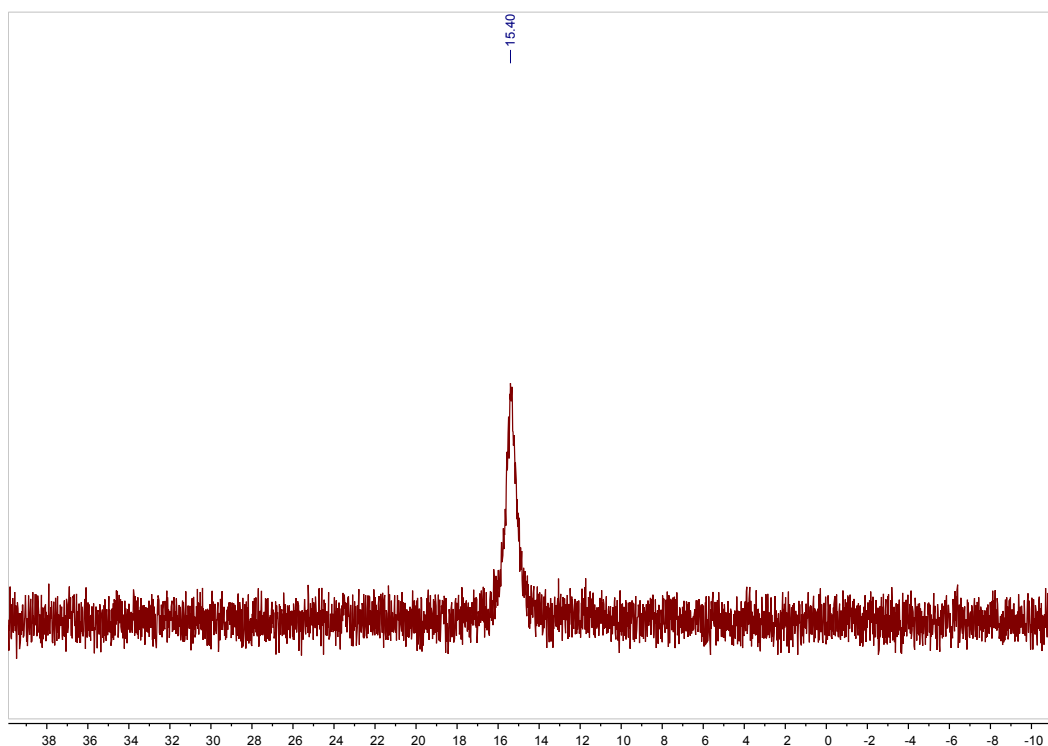

**Figure S2.**  $^{31}\text{P}$  NMR spectrum (162 MHz,  $\text{DMSO-d}_6$ ) of PO-Pd.

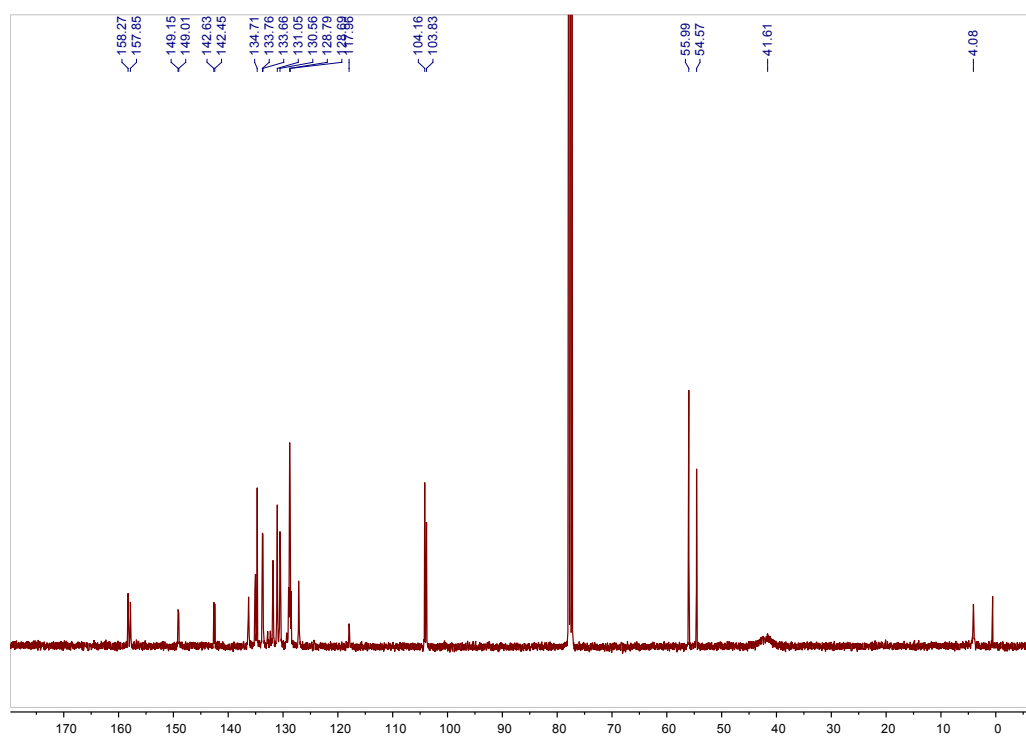

**Figure S3.**  $^{13}\text{C}$  NMR spectrum (100 MHz,  $\text{CDCl}_3$ ) of PO-Pd.

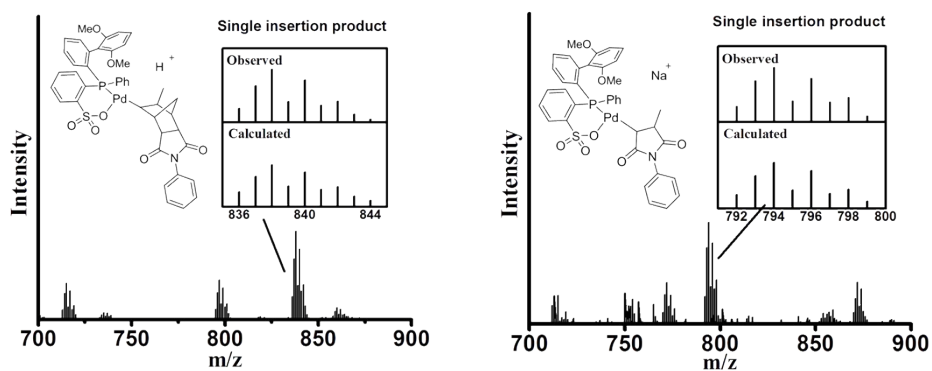

**Figure S4.** ESI-MS spectrum of a mixture of PO-Pd complex and comonomers (1:5). Inset: expanded experimental and calculated isotope patterns of single insertion product of comonomers into the Pd-allyl bond.

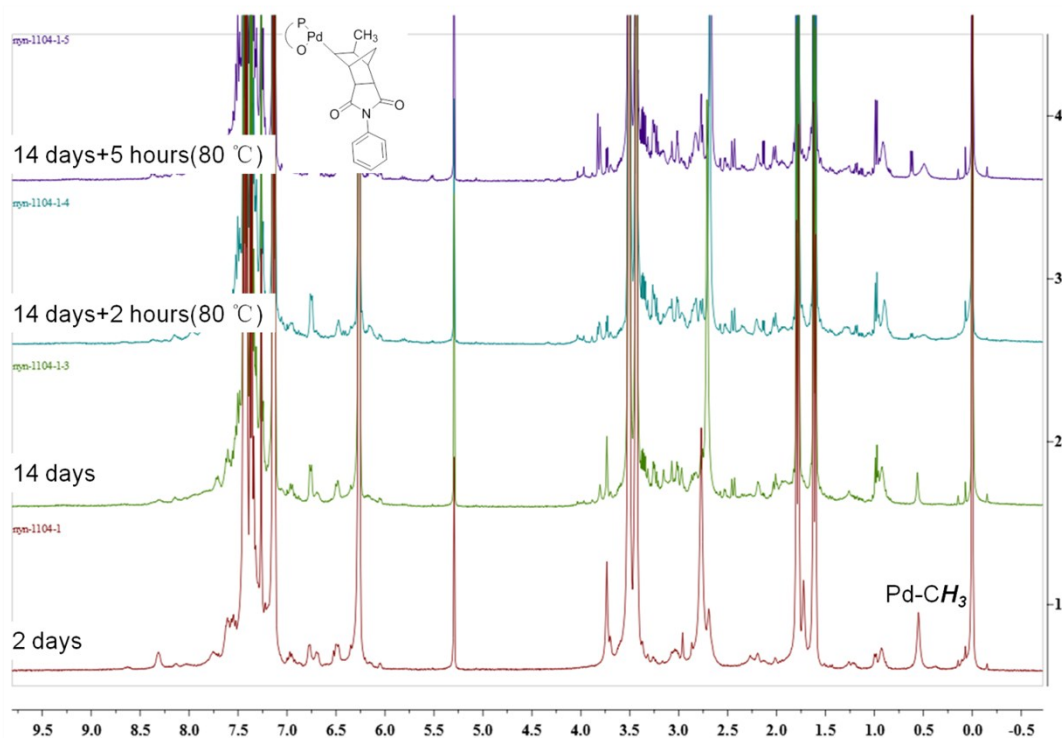

**Figure S5.**  $^1\text{H}$  NMR (CDCl<sub>3</sub>) monitoring of the reaction of PO-Pd (Pd-Me) with 5 eq of NB-NP at 25 °C.

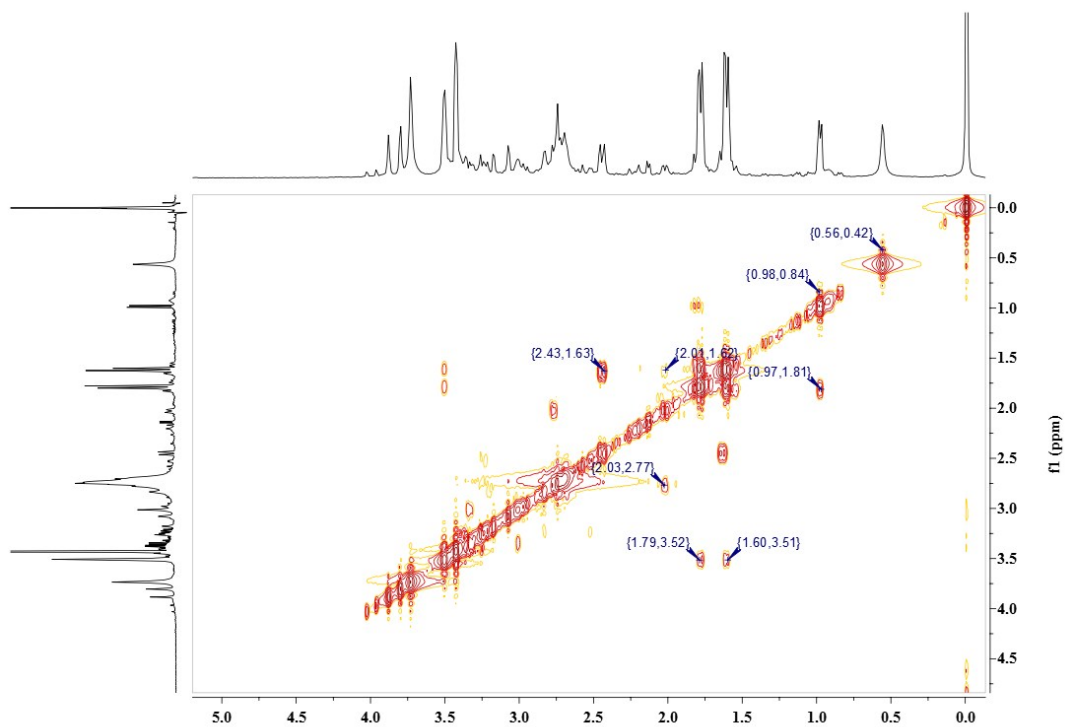

**Figure S6.**  $^1\text{H}$ - $^1\text{H}$  gCOSY 2D spectrum (25 °C,  $\text{CDCl}_3$ ) of POPd-NBNP.

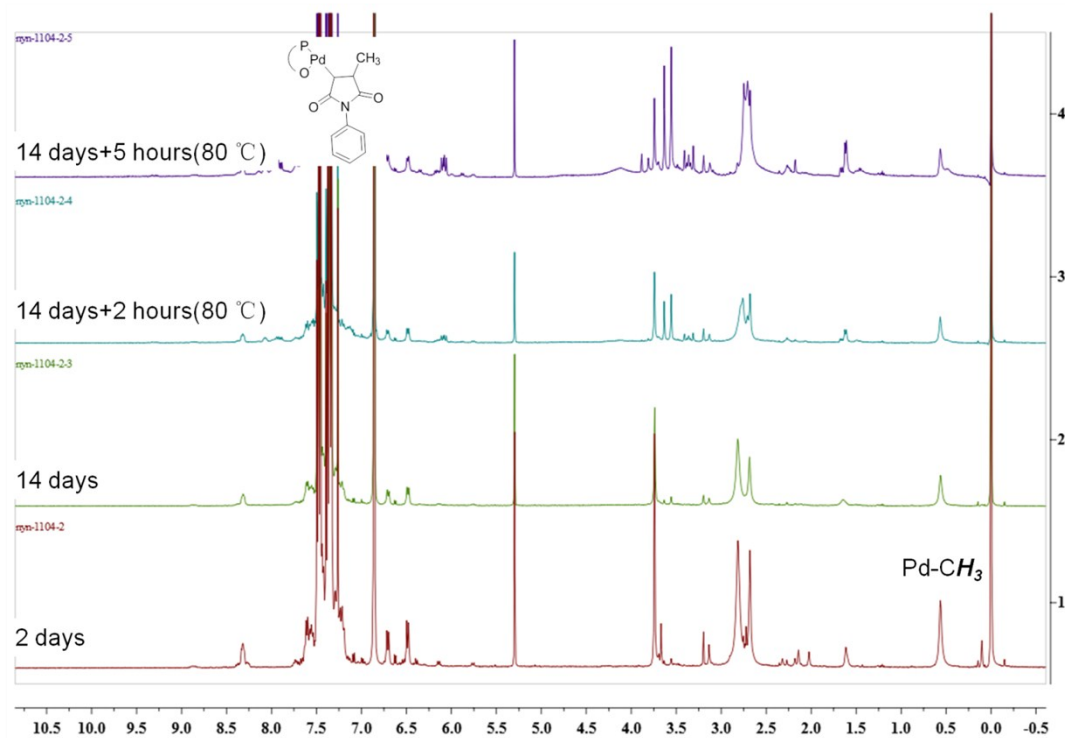

**Figure S7.**  $^1\text{H}$  NMR ( $\text{CD}_2\text{Cl}_2$ ) monitoring of the reaction of PO-Pd (Pd-Me) with 5 eq of NP at 25 °C.

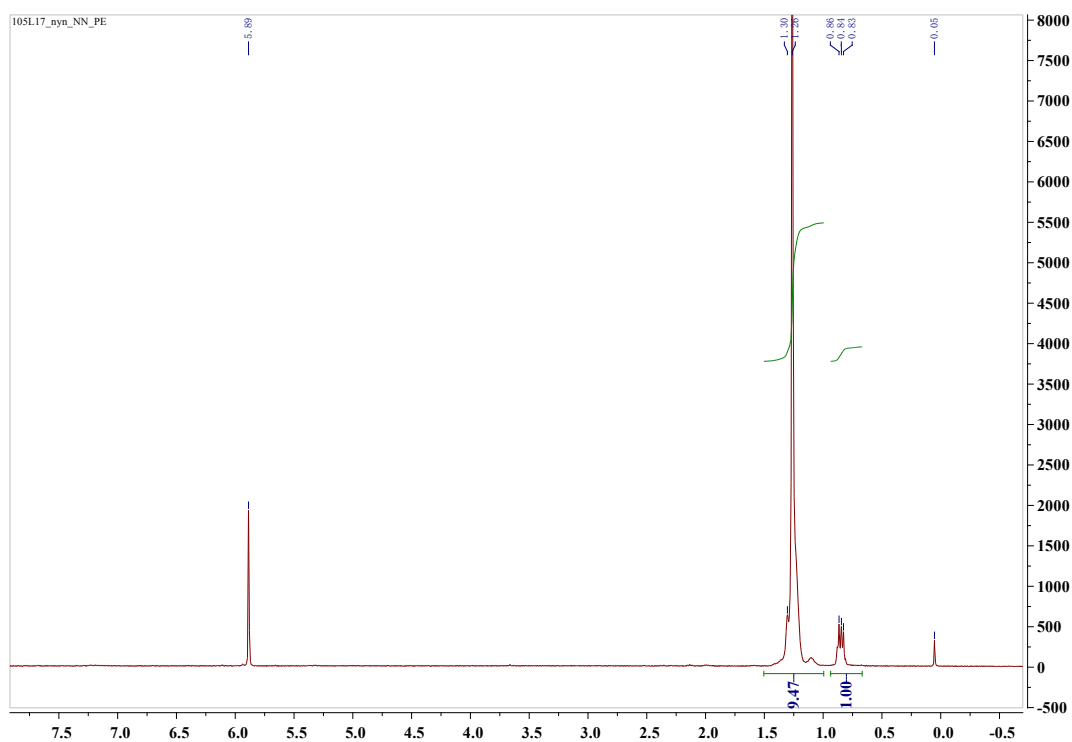

**Figure S8.**  $^1\text{H}$  NMR spectrum of the polymer from table 1, entry 1. ( $\text{C}_2\text{D}_2\text{Cl}_4$ , 120  $^\circ\text{C}$ ).

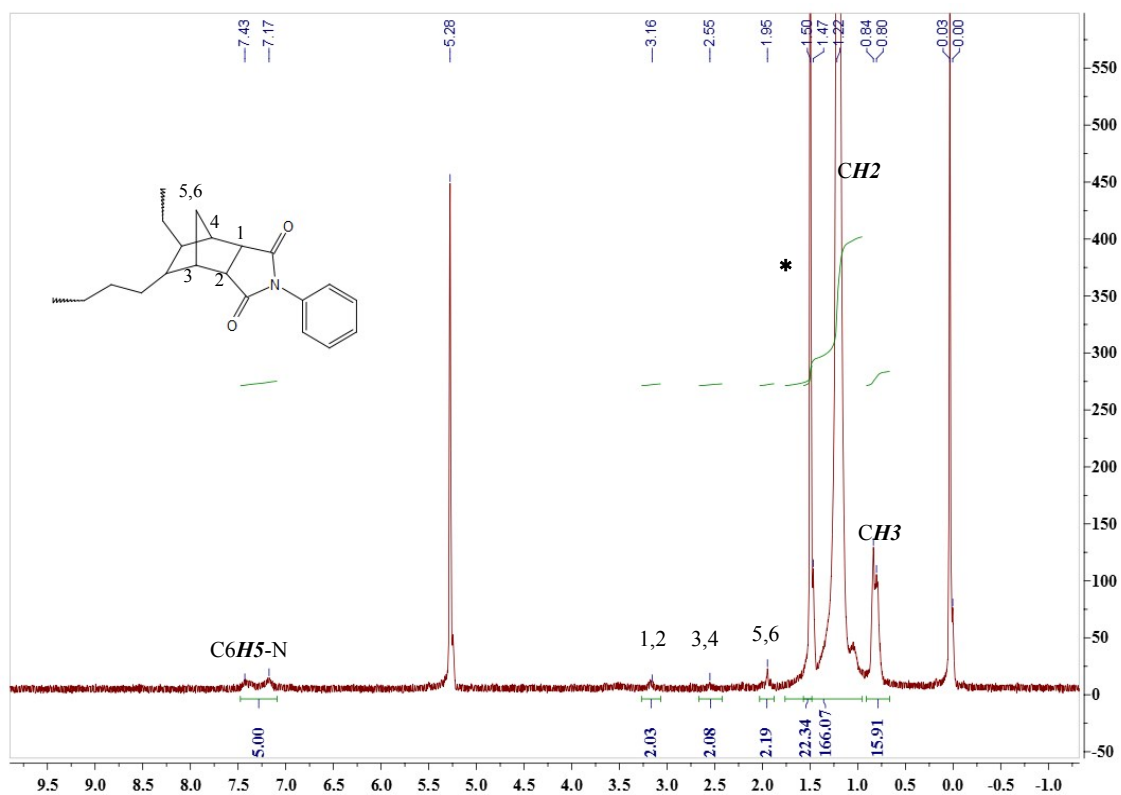

**Figure S9.**  $^1\text{H}$  NMR spectrum of the copolymer from table 1, entry 2. ( $\text{CD}_2\text{Cl}_2$ ). \*  $\text{H}_2\text{O}$ .

**Fig**



$$\text{Incorporation(\%)} = \frac{\frac{I(\text{C}_6\text{H}_5\text{N})/5}{\frac{I(\text{C}_6\text{H}_5\text{N})}{5} + \frac{I(\text{CH}_2) + I(\text{CH}_3) - 2}{4}} * 100\% = \frac{1}{1 + 39} * 100\% = 2.5\%$$

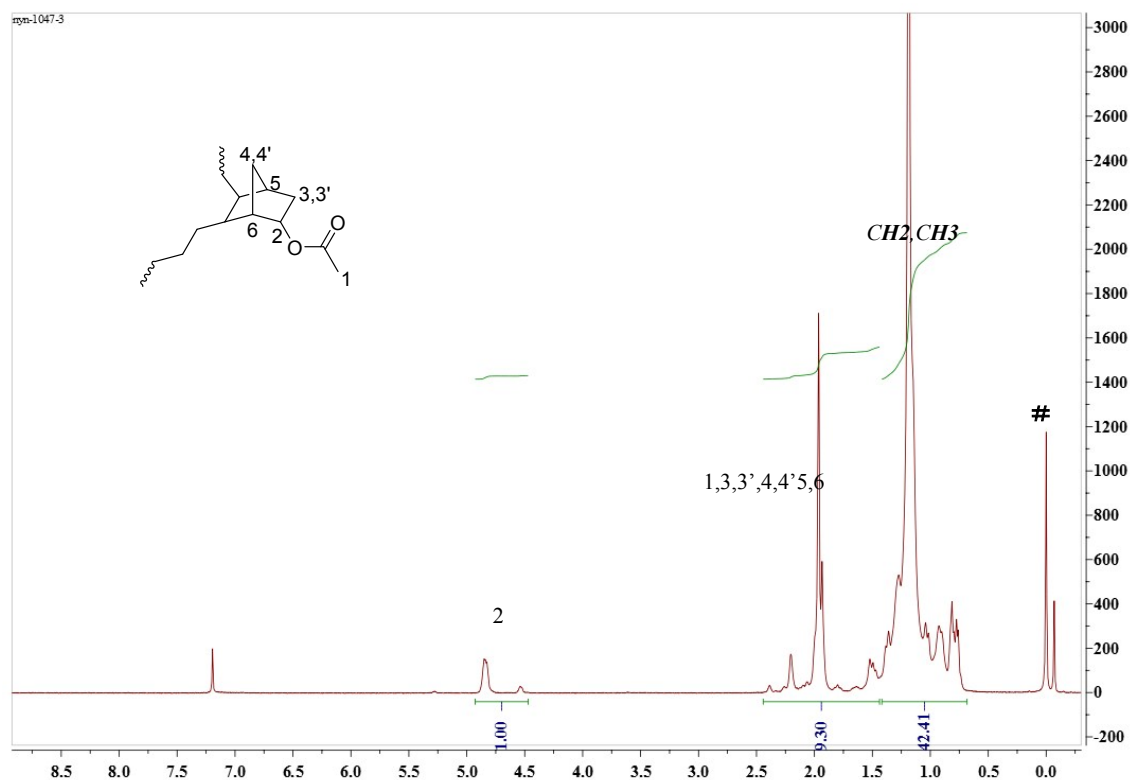

**Figure S10.**  $^1\text{H}$  NMR spectrum of the copolymer from table 1, entry 3. ( $\text{CDCl}_3$ ). #grease.

$$\text{Incorporation(\%)} = \frac{\frac{I(2)}{I(2) + \frac{I(\text{CH}_2) + I(\text{CH}_3) - 2}{4}} * 100\% = \frac{1}{1 + 10} * 100\% = 9.1\%$$

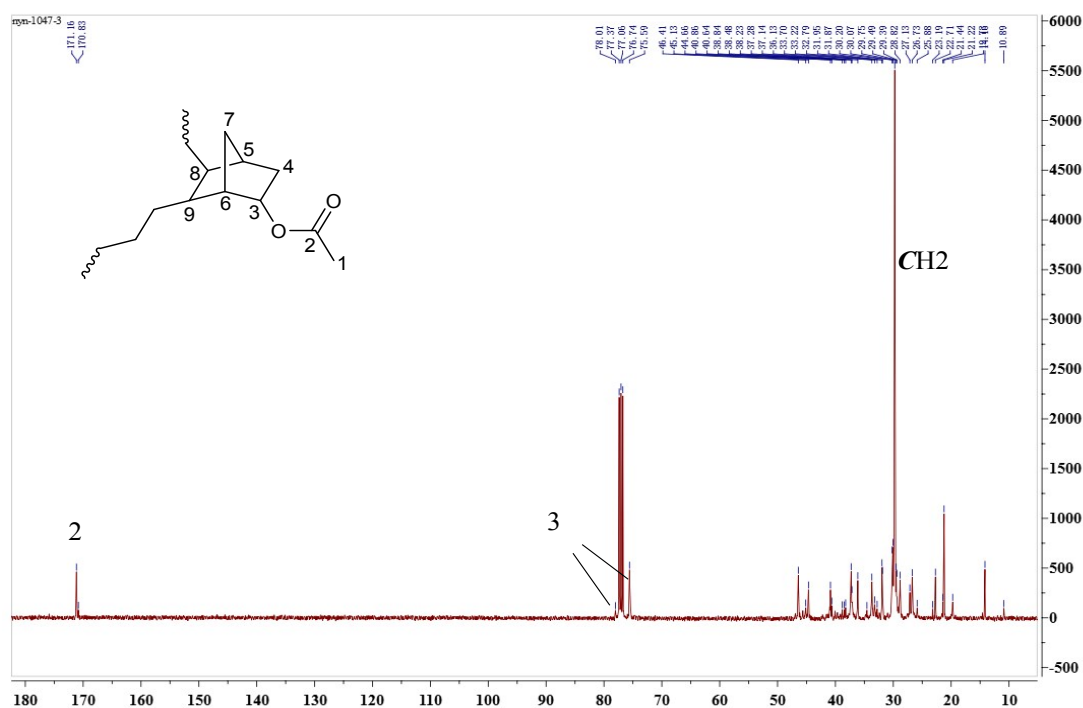

**Figure S11.**  $^{13}\text{C}$  NMR spectrum of the copolymer from table 1, entry 3. ( $\text{CDCl}_3$ ).

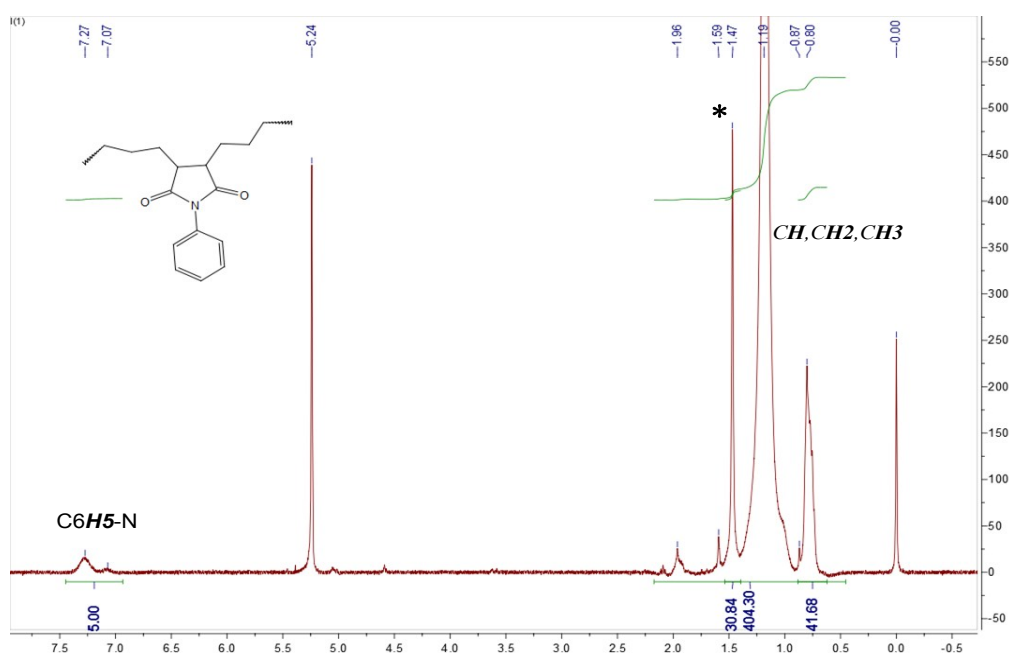

**Figure S12.**  $^1\text{H}$  NMR spectrum of the copolymer from table 1, entry 4. ( $\text{CD}_2\text{Cl}_2$ ). \*  $\text{H}_2\text{O}$ .

$$\text{Incorporation(\%)} = \frac{\frac{I(\text{C6H5N})/5}{I(\text{C6H5N}) + \frac{I(\text{CH2}) + I(\text{CH3}) - 2}{4}} * 100\% = \frac{1}{1 + 93} * 100\% = 1.1\%$$

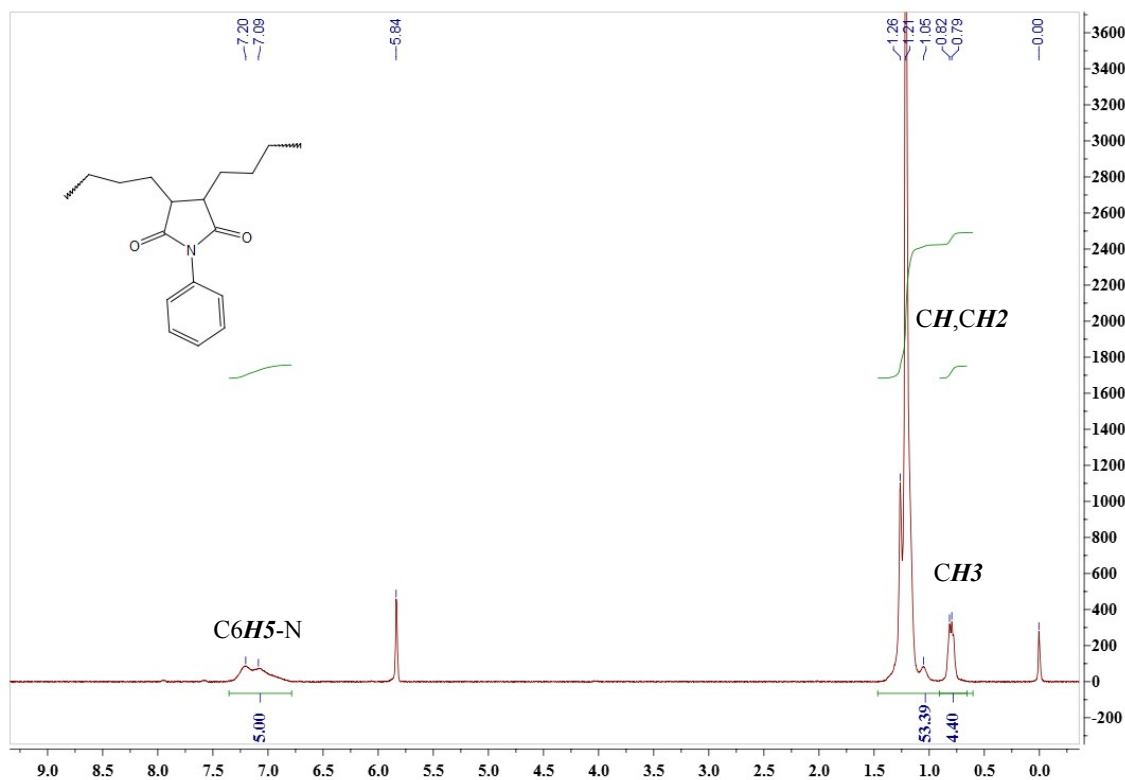

**Figure S13.**  $^1\text{H}$  NMR spectrum of the copolymer from table 1, entry 5. ( $\text{CD}_2\text{Cl}_2$ ).

$$\text{Incorporation(\%)} = \frac{\frac{I(\text{C}_6\text{H}_5\text{N})/5}{\frac{I(\text{C}_6\text{H}_5\text{N})}{5} + \frac{I(\text{CH}_2) + I(\text{CH}_3) - 2}{4}} * 100\% = \frac{1}{1 + 13} * 100\% = 7.1\%$$

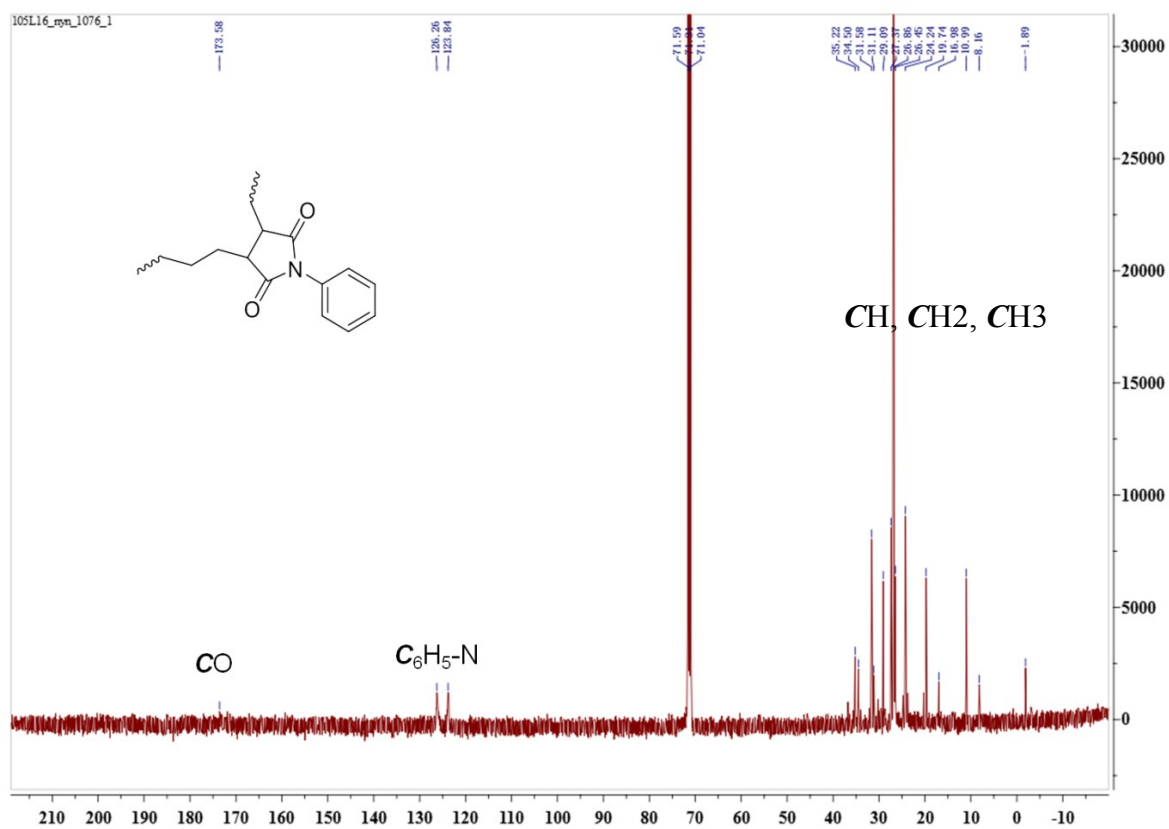

**Figure S14.** <sup>13</sup>C NMR spectrum of the copolymer from table 1, entry 5. (CD<sub>2</sub>Cl<sub>2</sub>).

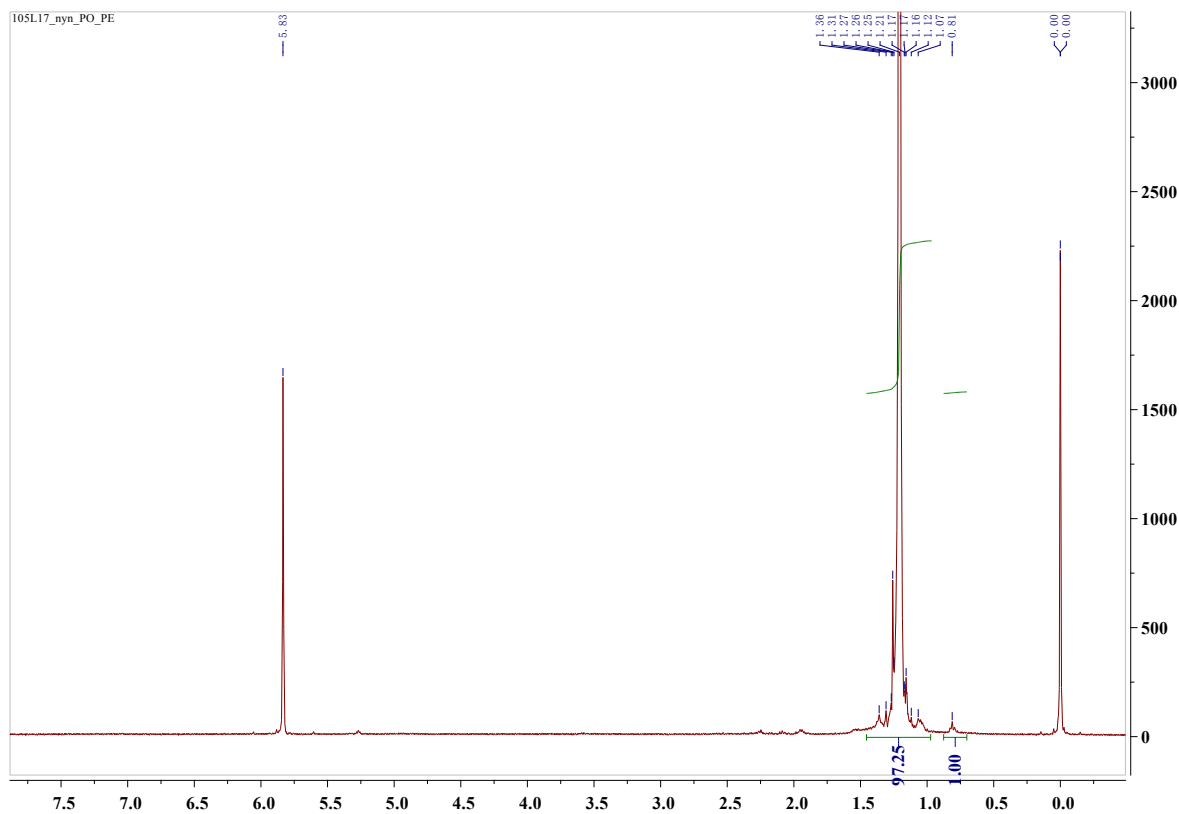

**Figure S15.**  $^1\text{H}$  NMR spectrum of the polymer from table 1, entry 6. ( $\text{C}_2\text{D}_2\text{Cl}_4$ , 120  $^\circ\text{C}$ ).

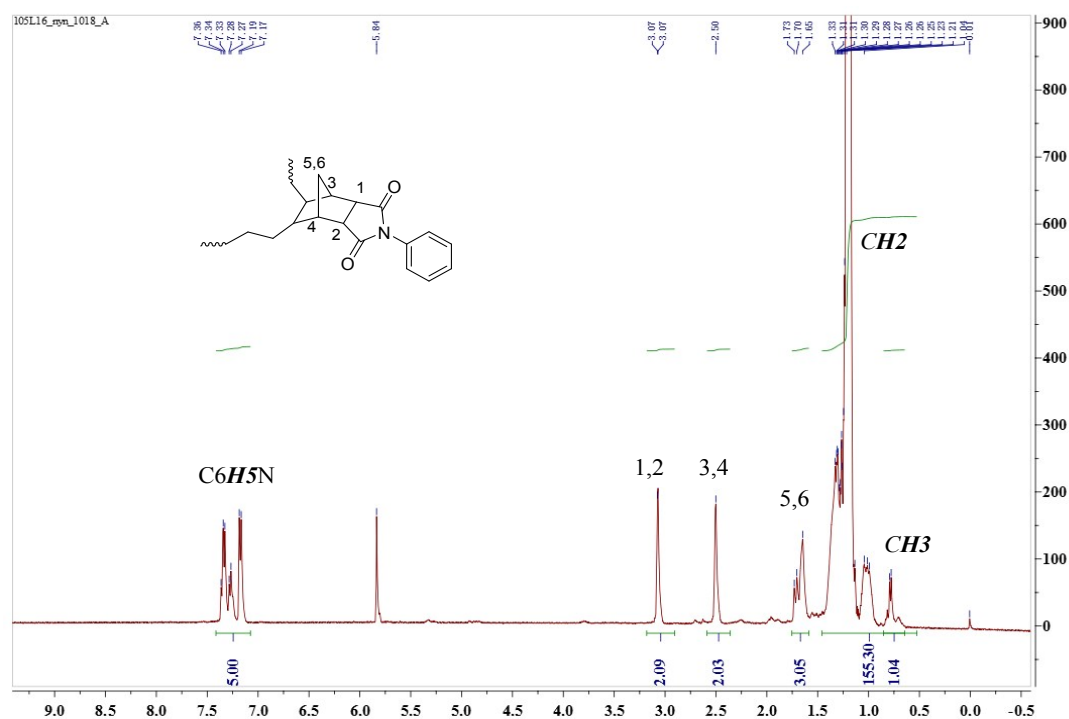

**Figure S16.**  $^1\text{H}$  NMR spectrum of the copolymer from table 1, entry 7. ( $\text{C}_2\text{D}_2\text{Cl}_4$ , 120  $^\circ\text{C}$ ).

$$\text{Incorporation(\%)} = \frac{\frac{I(\text{C6H5N})/5}{I(\text{C6H5N})} + \frac{I(\text{CH2}) + I(\text{CH3}) - 2}{4}}{\frac{1}{1 + 39}} * 100\% = \frac{1}{1 + 39} * 100\% = 2.5\%$$

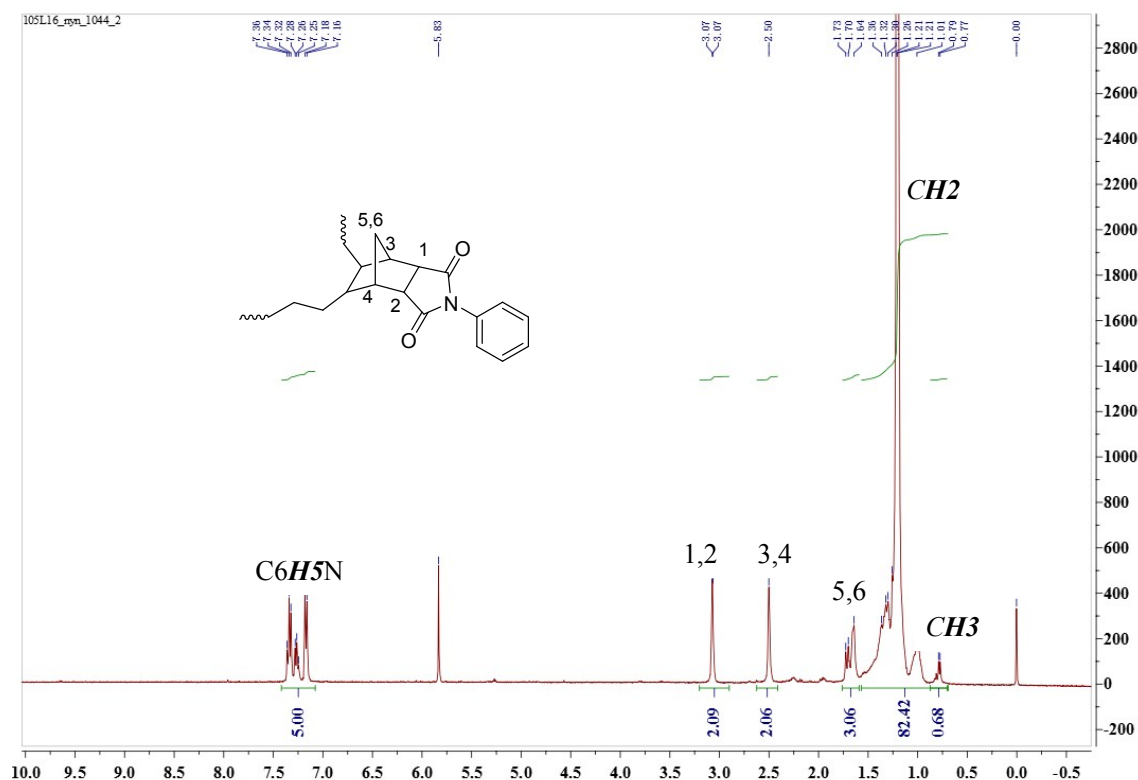

**Figure S17.**  $^1\text{H}$  NMR spectrum of the copolymer from table 1, entry 8. ( $\text{C}_2\text{D}_2\text{Cl}_4$ , 120  $^\circ\text{C}$ ).

$$\text{Incorporation(\%)} = \frac{\frac{I(\text{C6H5N})/5}{5} + \frac{I(\text{CH2}) + I(\text{CH3}) - 2}{4}}{\frac{I(\text{C6H5N})/5}{5} + \frac{I(\text{CH2}) + I(\text{CH3}) - 2}{4} + \frac{1}{1+20}} * 100\% = \frac{1}{1+20} * 100\% = 4.8\%$$

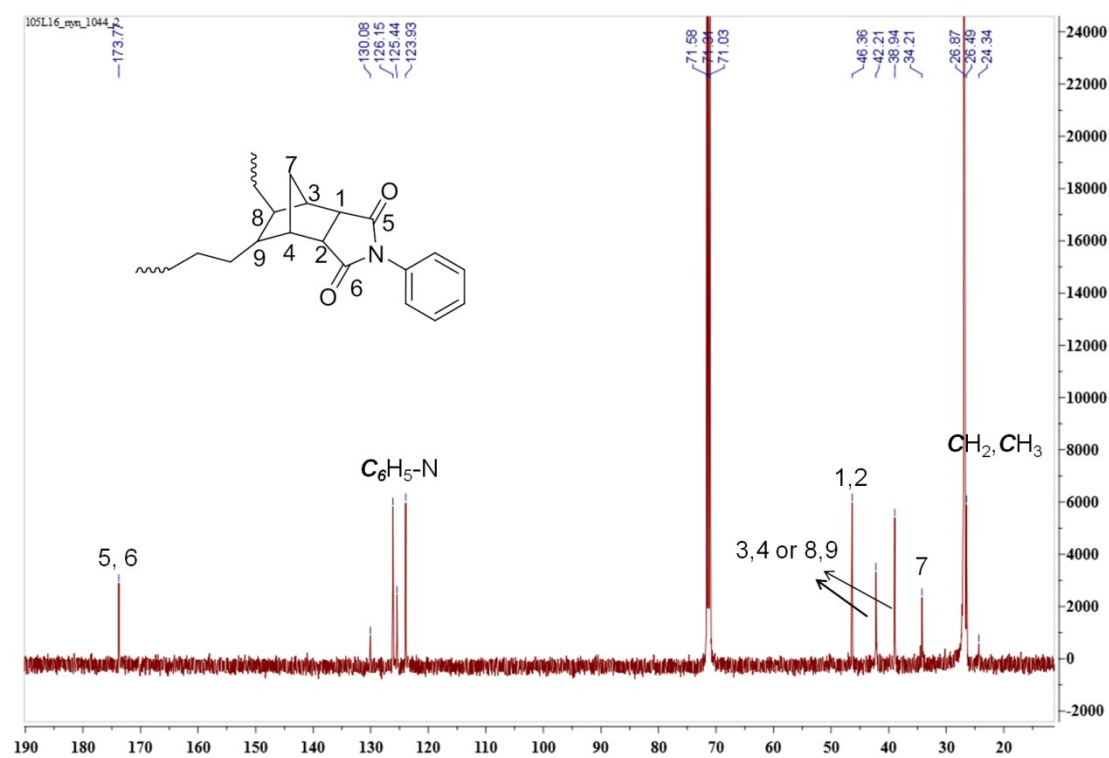

**Figure**

**S18.**  $^{13}\text{C}$  NMR spectrum of the copolymer from table 1, entry 8. ( $\text{C}_2\text{D}_2\text{Cl}_4$ , 120  $^\circ\text{C}$ ).

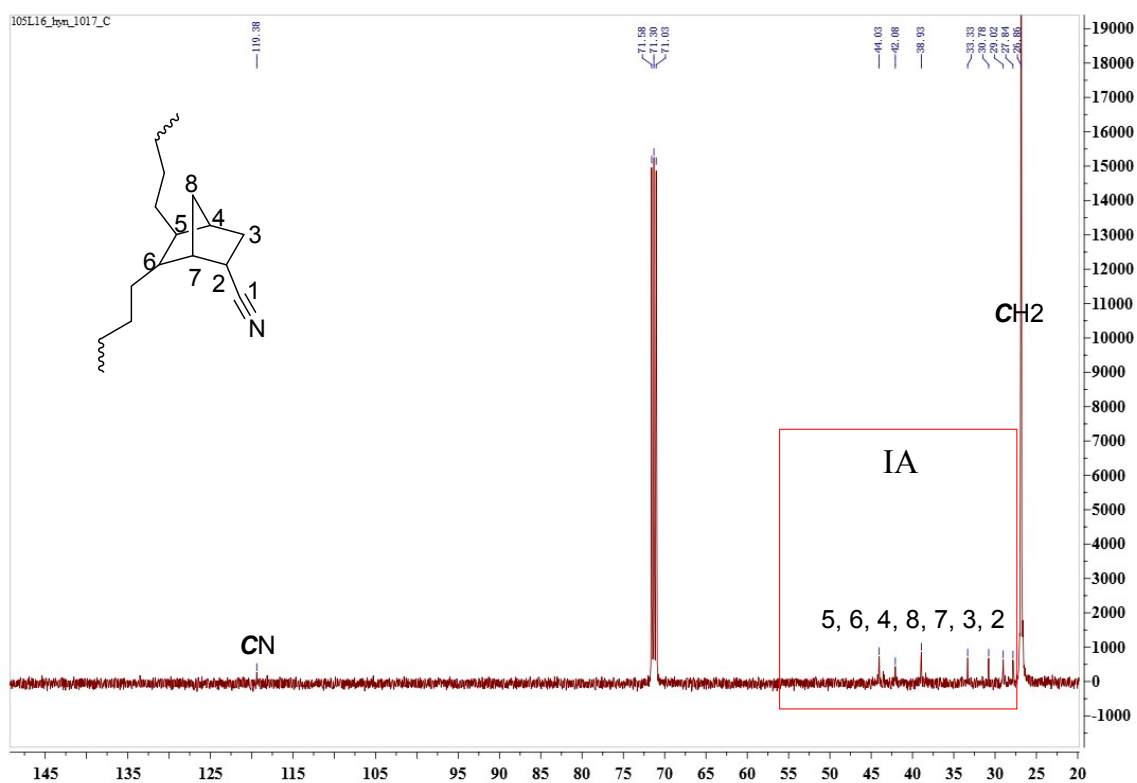

**Figure S19.**  $^{13}\text{C}$  NMR spectrum of the copolymer from table 1, entry 9. ( $\text{C}_2\text{D}_2\text{Cl}_4$ ,  $120^\circ\text{C}$ ).

$$\text{Incorporation}(\%) = \frac{IA/7}{IA/7 + I(\text{CH}_2)} * 100\% = \frac{1}{1 + 60} * 100\% = 1.6\%$$

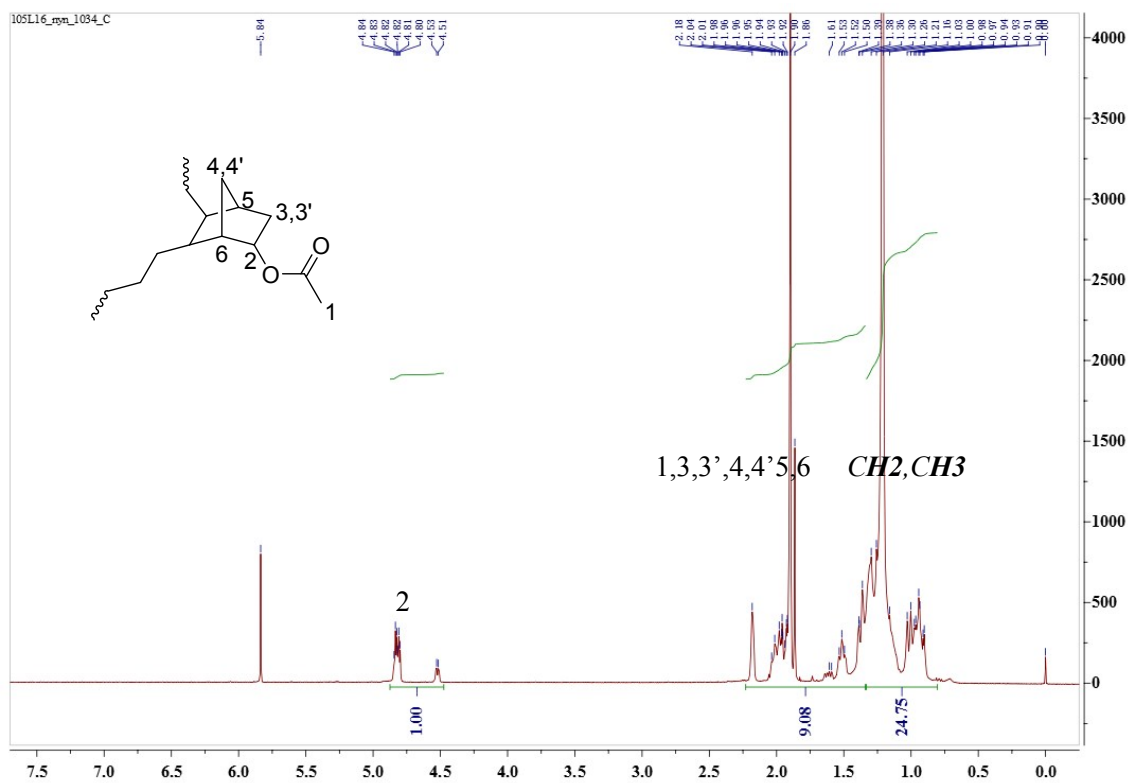

$$\text{Incorporation(\%)} = \frac{\frac{I(1)}{I(1) + \frac{I(CH2) + I(CH3) - 2}{4}}} * 100\% = \frac{1}{1 + 6} * 100\% = 14.3\%$$
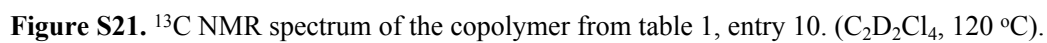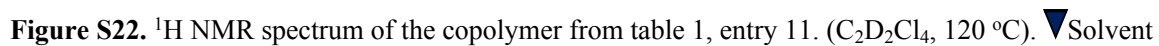

impurity.

$$\text{Incorporation(\%)} = \frac{\frac{I(\text{C6H5N})/5}{\frac{I(\text{C6H5N})}{5} + \frac{I(\text{CH2}) + I(\text{CH3}) - 2}{4}} * 100\% = \frac{1}{1 + 246} * 100\% = 0.4\%$$

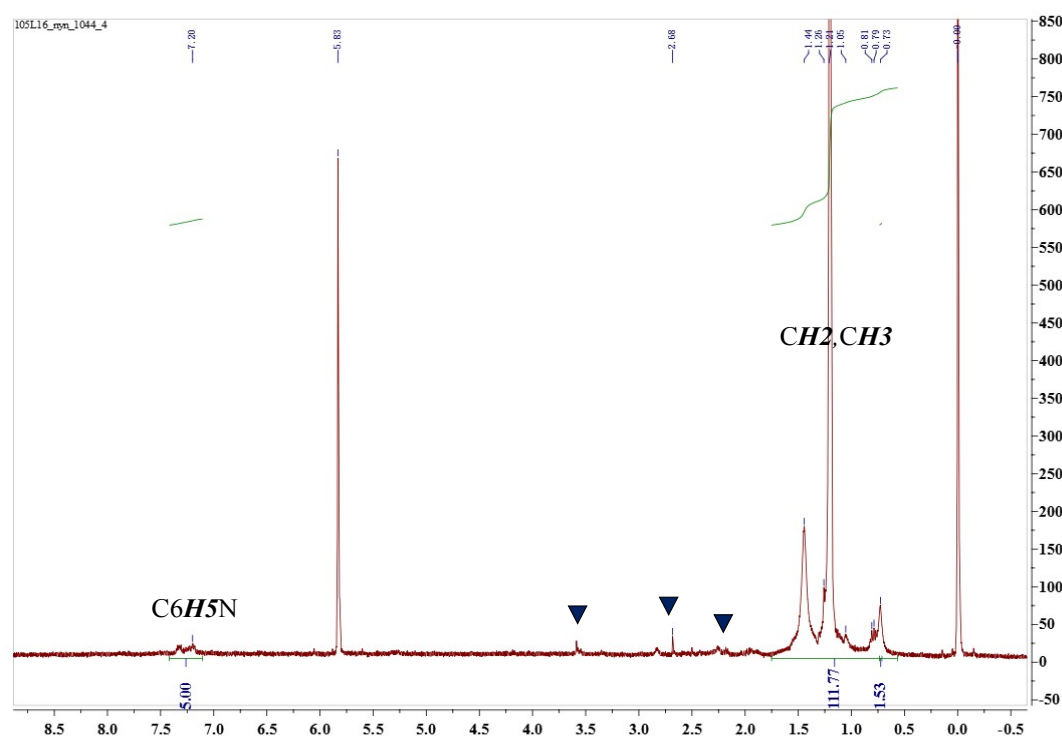

**Figure S23.**  $^1\text{H}$  NMR spectrum of the copolymer from table 1, entry 12. ( $\text{C}_2\text{D}_2\text{Cl}_4$ ,  $120^\circ\text{C}$ ).

$$\text{Incorporation(\%)} = \frac{\frac{I(\text{C6H5N})/5}{\frac{I(\text{C6H5N})}{5} + \frac{I(\text{CH2}) + I(\text{CH3}) - 2}{4}} * 100\% = \frac{1}{1 + 27} * 100\% = 3.6\%$$



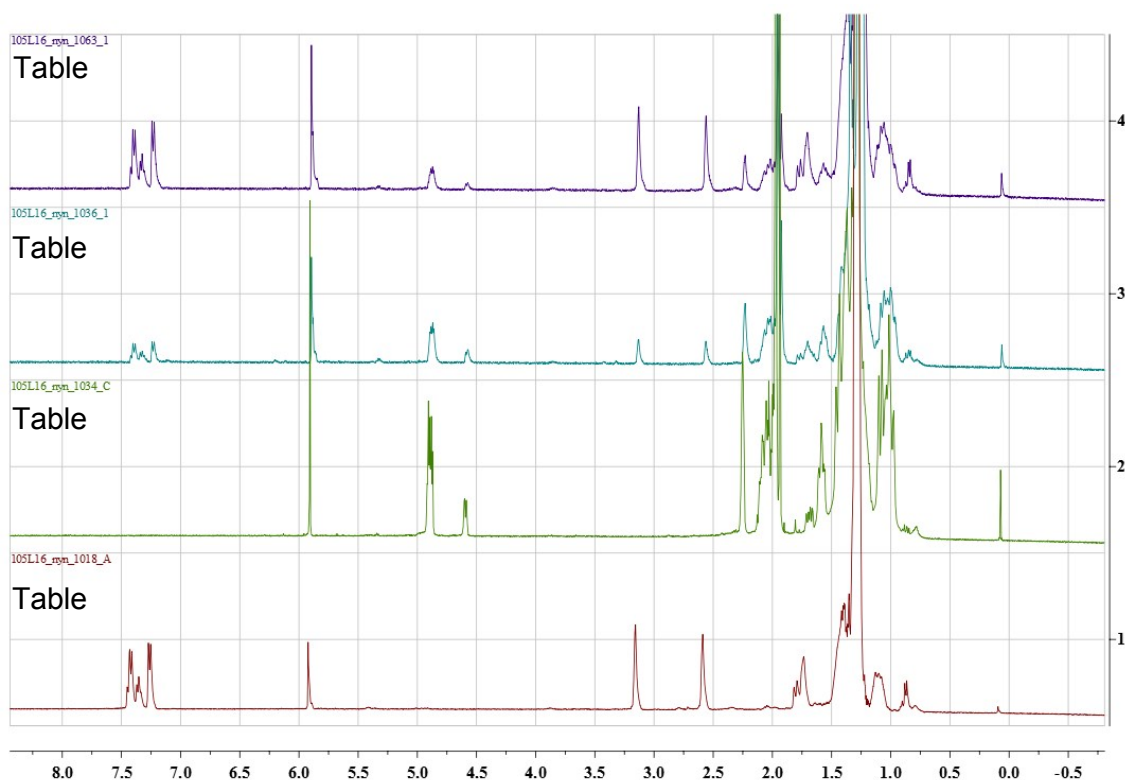

**Figure S24.**  $^1\text{H}$  NMR spectrum comparison of the terpolymers (ethylene/NB-NP/NB-OAc) and copolymers (ethylene/NB-NP and ethylene/NB-OAc).

The terpolymers showed peaks that are not shifted from those of their constituent copolymers.

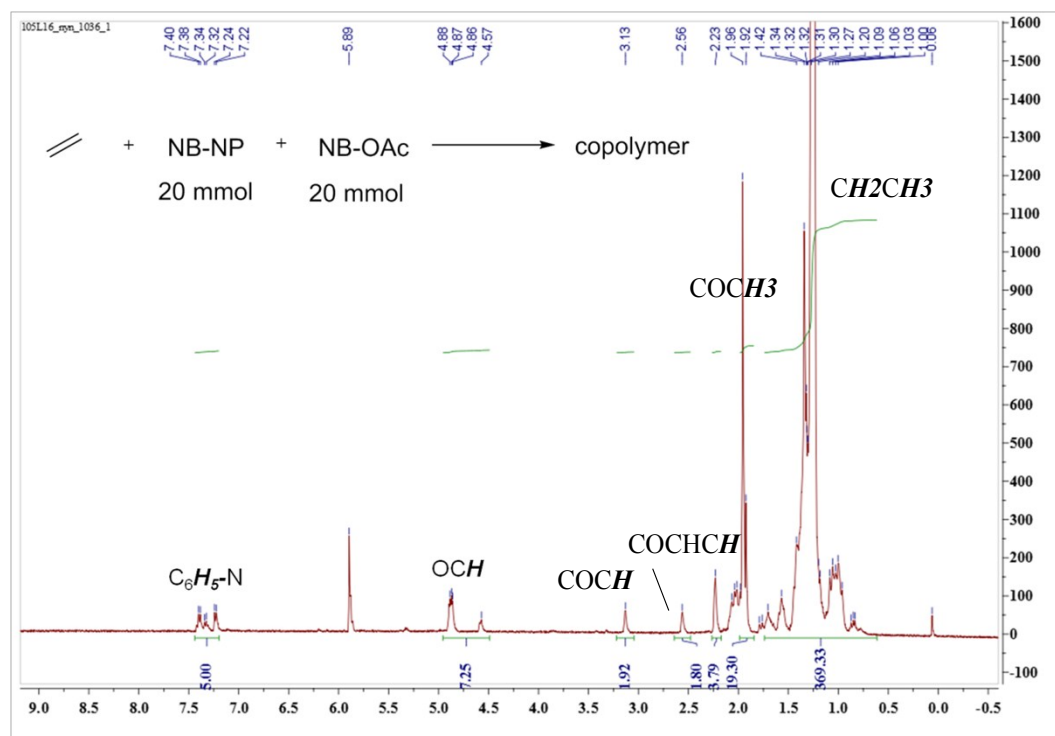

**Figure S25.**  $^1\text{H}$  NMR spectrum of the copolymer from table 2, entry 1. ( $\text{C}_2\text{D}_2\text{Cl}_4$ ,  $120^\circ\text{C}$ ).

$$\text{Incorporation(\%)} \text{ of NB-NP} = \frac{\frac{I(C6H5N)/5}{\frac{I(C6H5N)}{5} + \frac{I(CH2) + I(CH3) - 2}{4}} * 100\% = \frac{1}{1 + 92} * 100\% = 1.1\%$$

$$\text{Incorporation(\%)} \text{ of NB-OAc} = 7.25 * 1.1\% = 8.0\%$$

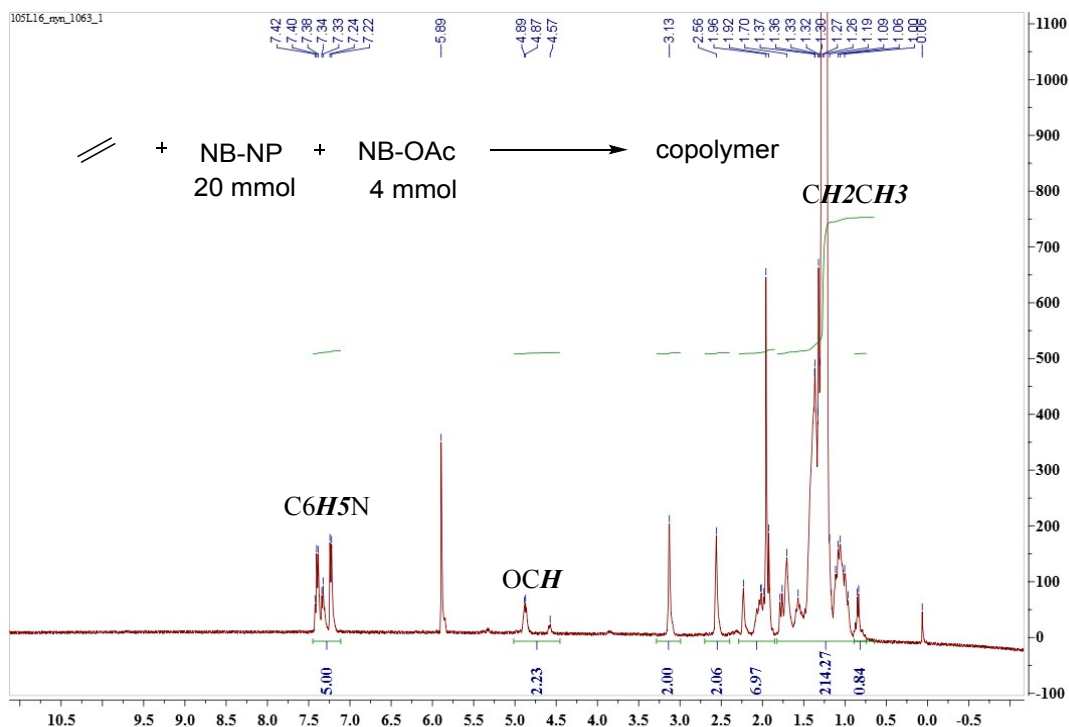

**Figure S26.**  $^1\text{H}$  NMR spectrum of the copolymer from table 2, entry 2. ( $\text{C}_2\text{D}_2\text{Cl}_4$ ,  $120^\circ\text{C}$ ).

$$\text{Incorporation(\%)} \text{ of NB-NP} = \frac{\frac{I(C6H5N)/5}{\frac{I(C6H5N)}{5} + \frac{I(CH2) + I(CH3) - 2}{4}} * 100\% = \frac{1}{1 + 53} * 100\% = 1.9\%$$

$$\text{Incorporation(\%)} \text{ of NB-OAc} = 2.23 * 1.9\% = 4.2\%$$

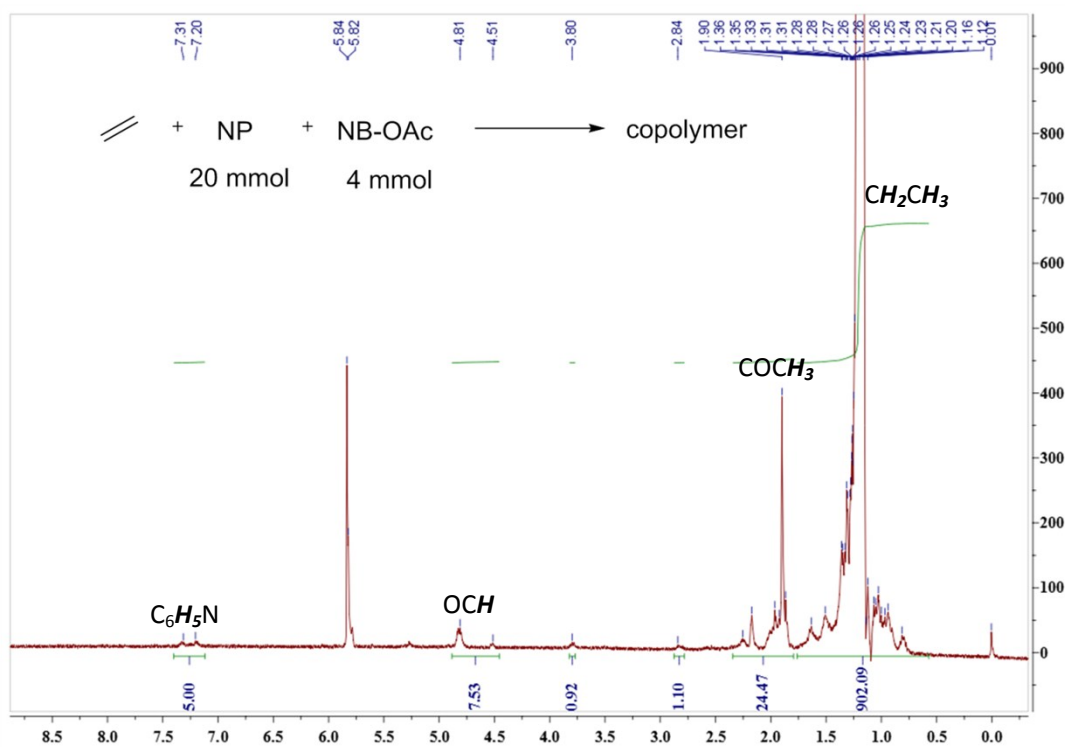

**Figure S27.**  $^1H$  NMR spectrum of the copolymer from table 2, entry 3. ( $C_2D_2Cl_4$ , 120 °C).

$$\text{Incorporation(\%)} \text{ of NB-NP} = \frac{\frac{I(C_6H_5N)/5}{I(C_6H_5N) + \frac{I(CH_2) + I(CH_3) - 2}{4}} * 100\%}{5} = \frac{1}{1 + 225} * 100\% = 0.4\%$$

$$\text{Incorporation(\%)} \text{ of NB-OAc} = 7.53 * 0.4\% = 3.0\%$$

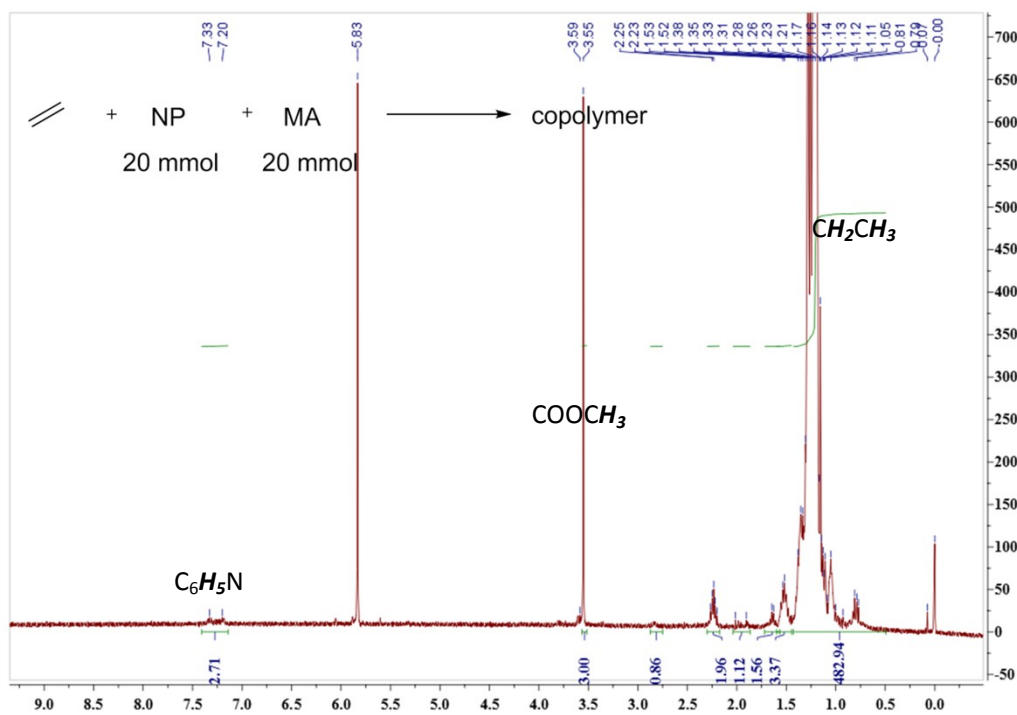

**Figure S28.**  $^1H$  NMR spectrum of the copolymer from table 2, entry 4. ( $C_2D_2Cl_4$ , 120 °C).

$$\text{Incorporation(\% of MA)} = \frac{\frac{I(\text{COOCH}_3)/3}{\frac{I(\text{COOCH}_3)}{3} + \frac{I(\text{CH}_2) + I(\text{CH}_3)}{4}} * 100\% = \frac{1}{1 + 120} * 100\% = 0.8\%$$

$$\text{Incorporation(\% of NP)} = 2.71/5 * 0.8\% = 0.4\%$$

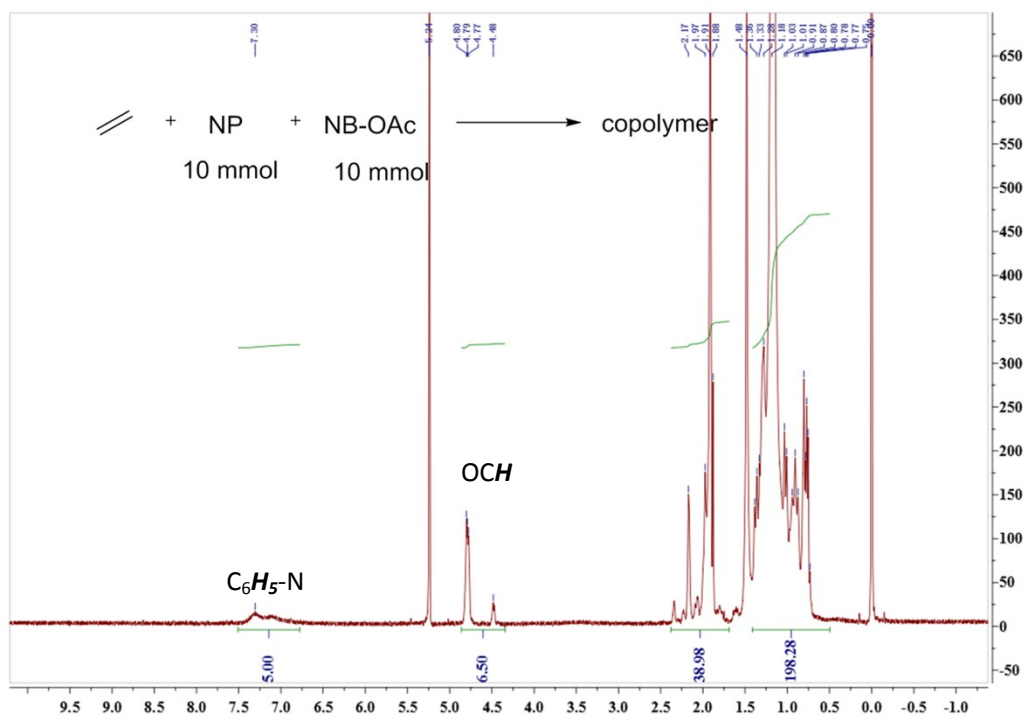

**Figure S29.**  $^1\text{H}$  NMR spectrum of the copolymer from table 2, entry 5. ( $\text{CD}_2\text{Cl}_2$ ). \*  $\text{H}_2\text{O}$ .

$$\text{Incorporation(\% of NP)} = \frac{\frac{I(\text{C}_6\text{H}_5\text{N})/5}{\frac{I(\text{C}_6\text{H}_5\text{N})}{5} + \frac{I(\text{CH}_2) + I(\text{CH}_3) - 2}{4}} * 100\% = \frac{1}{1 + 49} * 100\% = 2.0\%$$

$$\text{Incorporation(\% of NB-OAc)} = 6.5 * 2.0\% = 13.0\%$$

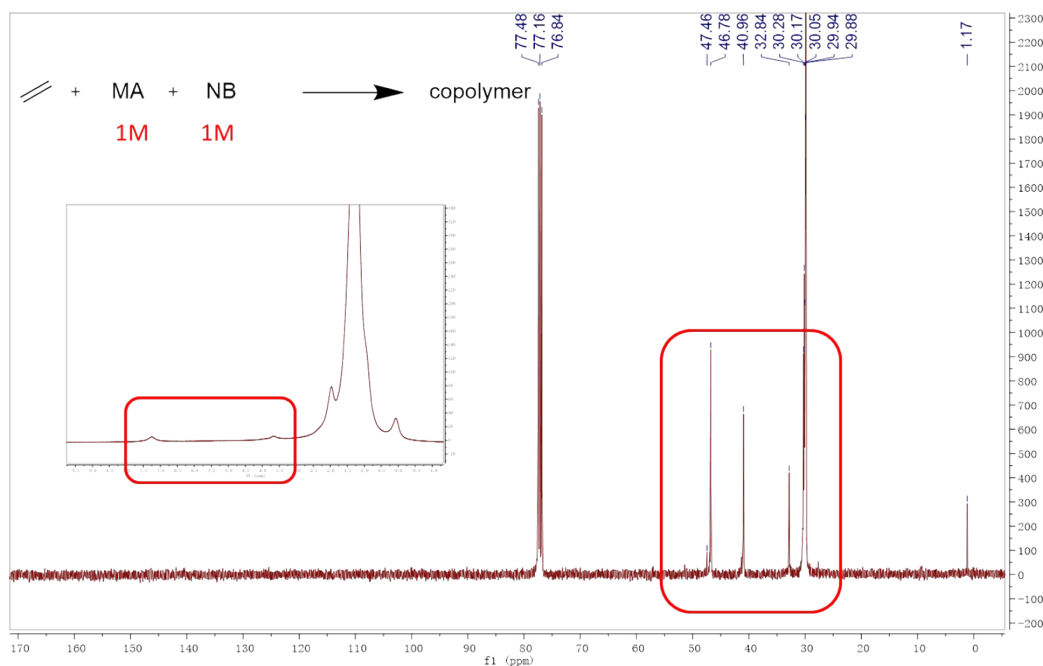

**Figure S30.** <sup>13</sup>C NMR spectrum of the attempted E-MA-NB MA 1 mol/L, NB 1 mol/L) terpolymerization product. The characteristic peaks between  $\delta$  30 and 50 ppm are from NB comonomer.

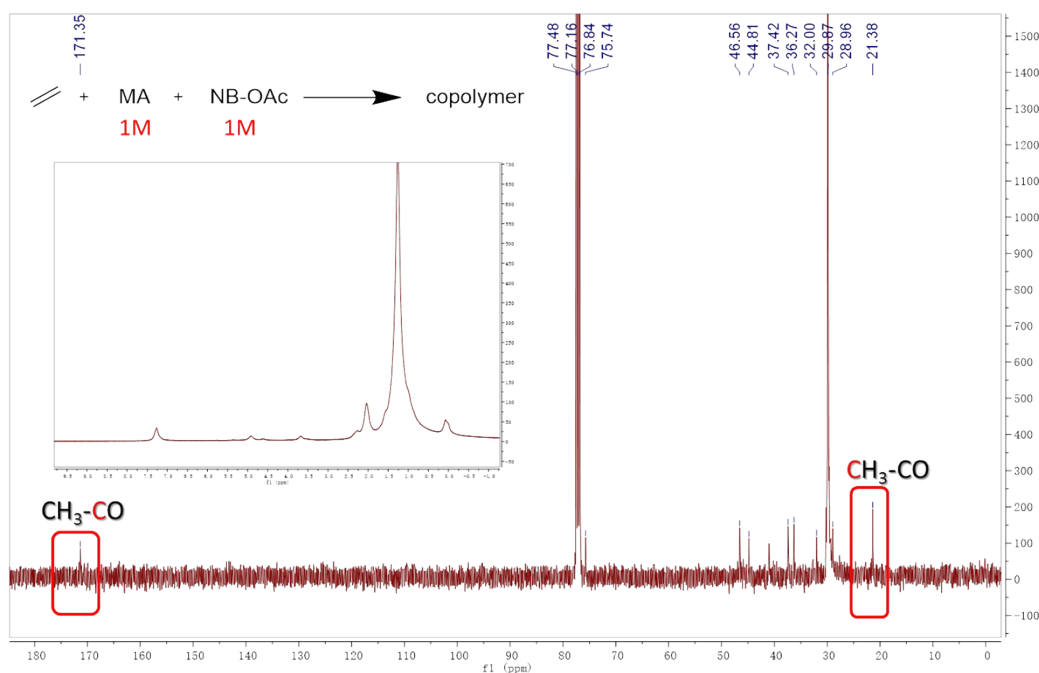

**Figure S31.** <sup>13</sup>C NMR spectrum of the attempted E-MA-NB-OAc (MA 1 mol/L, NB-OAc 1 mol/L) terpolymerization product. Only the characteristic peaks from NB-OAc comonomer were observed.

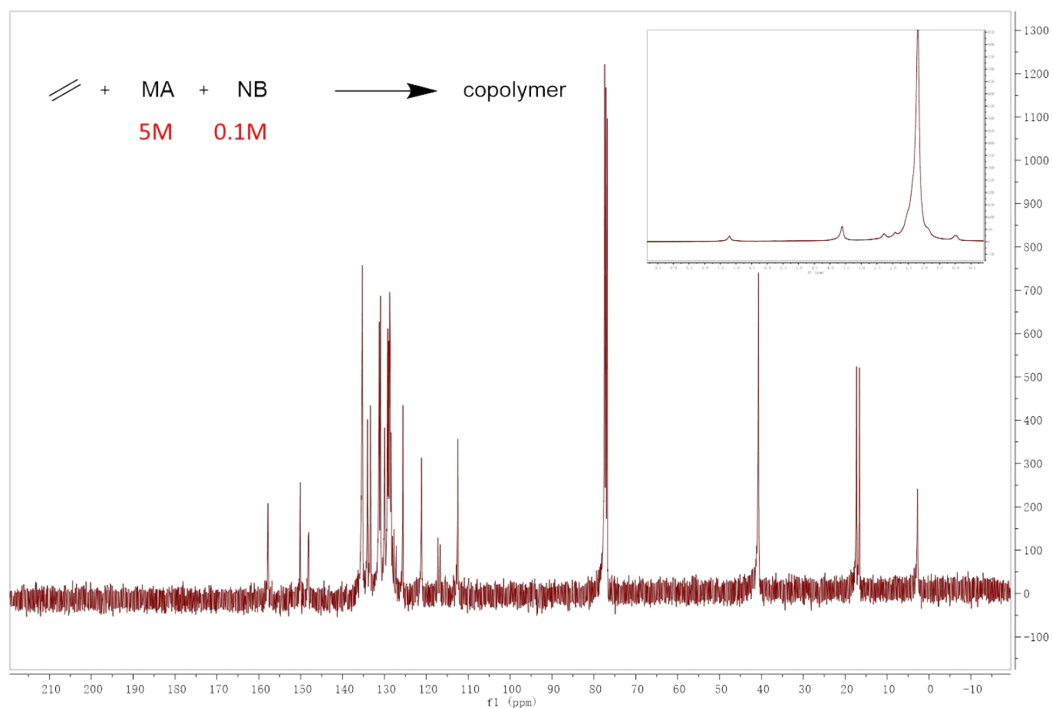

**Figure S32.**  $^{13}\text{C}$  NMR spectrum of the attempted E-MA-NB (MA 5 mol/L, NB 0.1 mol/L) terpolymerization product. Only the characteristic peaks from **MA** comonomer were observed (the peaks between  $\delta$  110 and 160 ppm are from the catalyst residue).

## 2.2 DSC, GPC of copolymer.

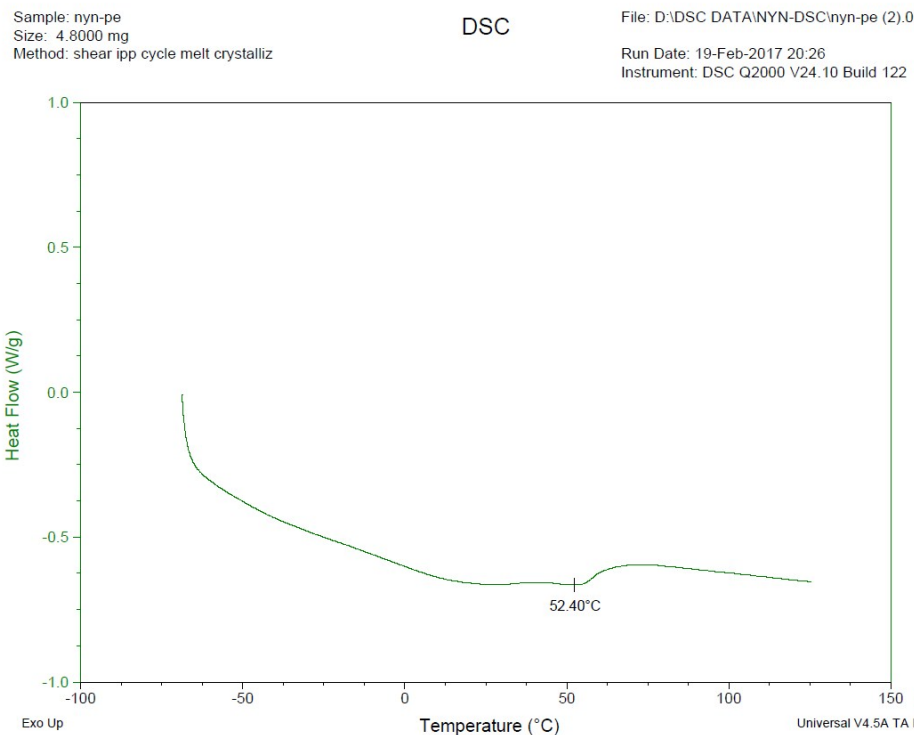

**Figure S33.** DSC of the copolymer from table 1, entry 1.

Sample: nyn-1047-a-20170214  
Size: 4.9800 mg

DSC

File: E:\NNPD\nyn-1047-a-20170214.txt  
Operator: ding  
Run Date: 15-Feb-2017 05:16  
Instrument: DSC Q2000 V24.10 Build 122

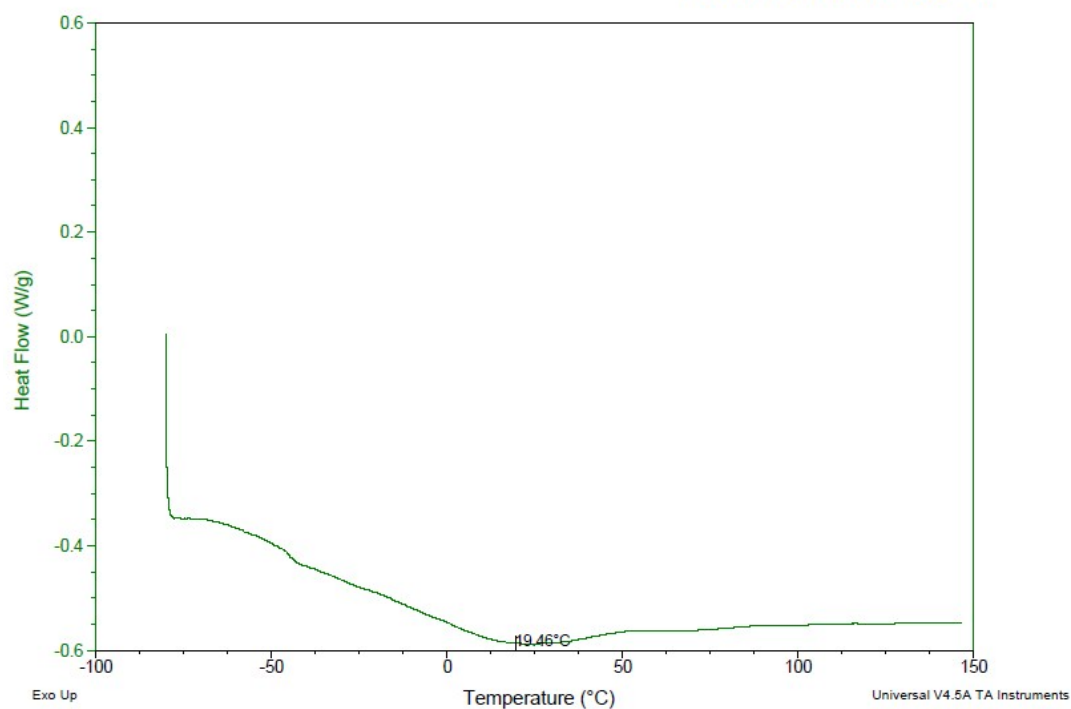

**Figure S34.** DSC of the copolymer from table 1, entry 2.

Sample: nyn-1047-c-20170214  
Size: 5.7000 mg

DSC

File: E:\NNPD\nyn-1047-c-20170214.txt  
Operator: ding  
Run Date: 15-Feb-2017 08:35  
Instrument: DSC Q2000 V24.10 Build 122

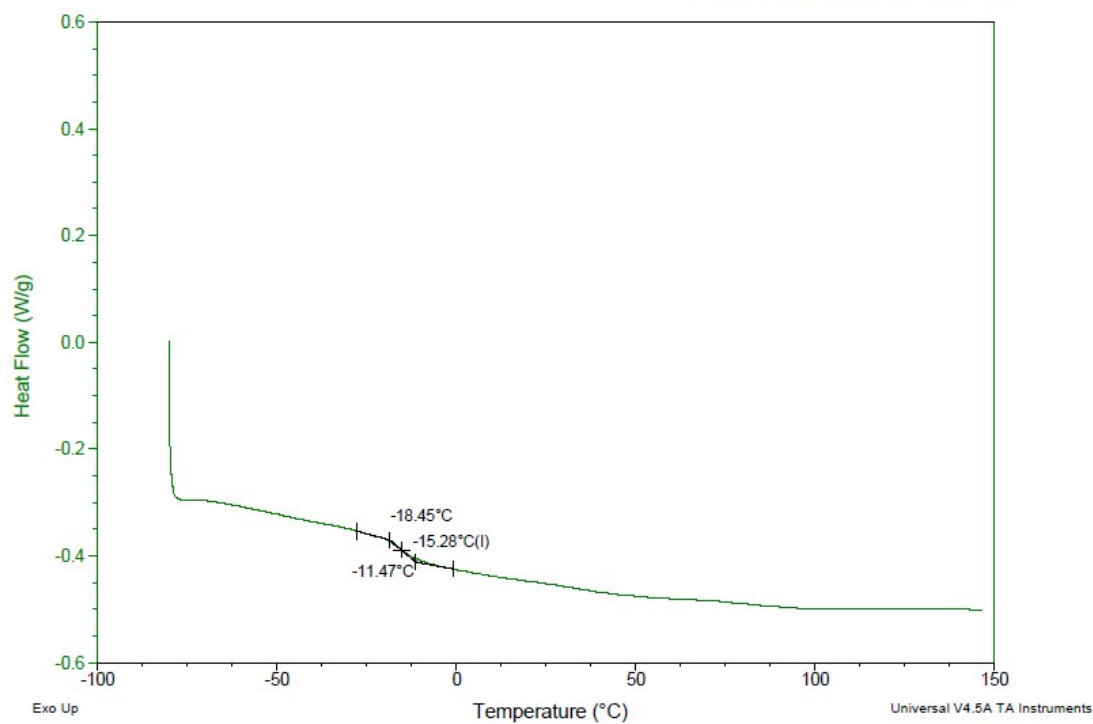

**Figure S35.** DSC of the copolymer from table 1, entry 3.

Sample: nyn-1047-b-20170214  
Size: 8.0200 mg

DSC

File: E:\NNPD\nyn-1047-b-20170214.txt  
Operator: ding  
Run Date: 15-Feb-2017 06:56  
Instrument: DSC Q2000 V24.10 Build 122

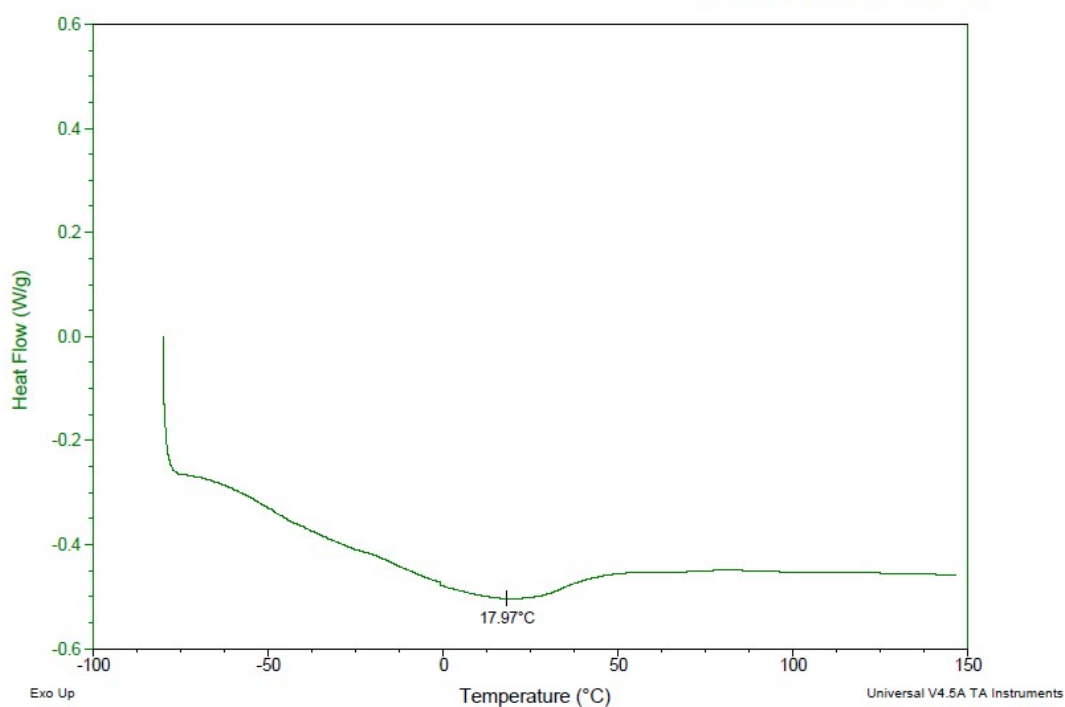

**Figure S36.** DSC of the copolymer from table 1, entry 4.

Sample: nyn-1076-1-20170214  
Size: 5.6200 mg

DSC

File: E:\NNPD\nyn-1076-1-20170214.txt  
Operator: ding  
Run Date: 15-Feb-2017 11:55  
Instrument: DSC Q2000 V24.10 Build 122

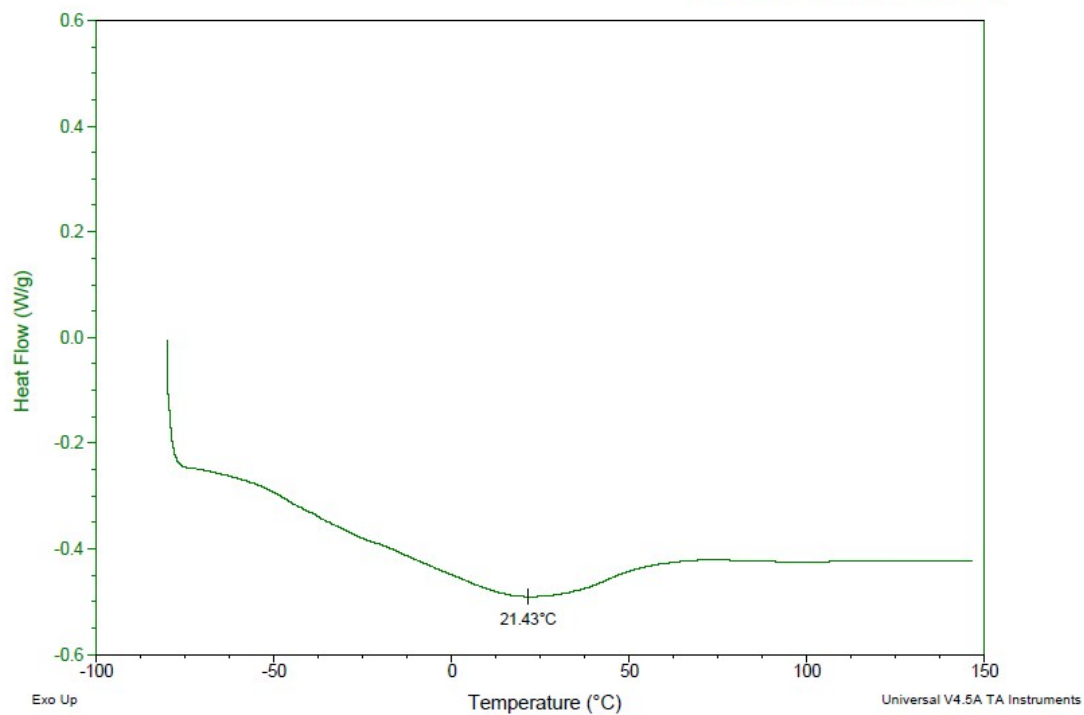

**Figure S37.** DSC of the copolymer from table 1, entry 5.



Sample: NYN-PE  
Size: 5.0000 mg  
Method: Ramp

DSC

File: D:\DSC DATA\NYN-DSC\NYN-PE.002

Run Date: 19-Dec-2016 11:45  
Instrument: DSC Q20 V24.11 Build 124

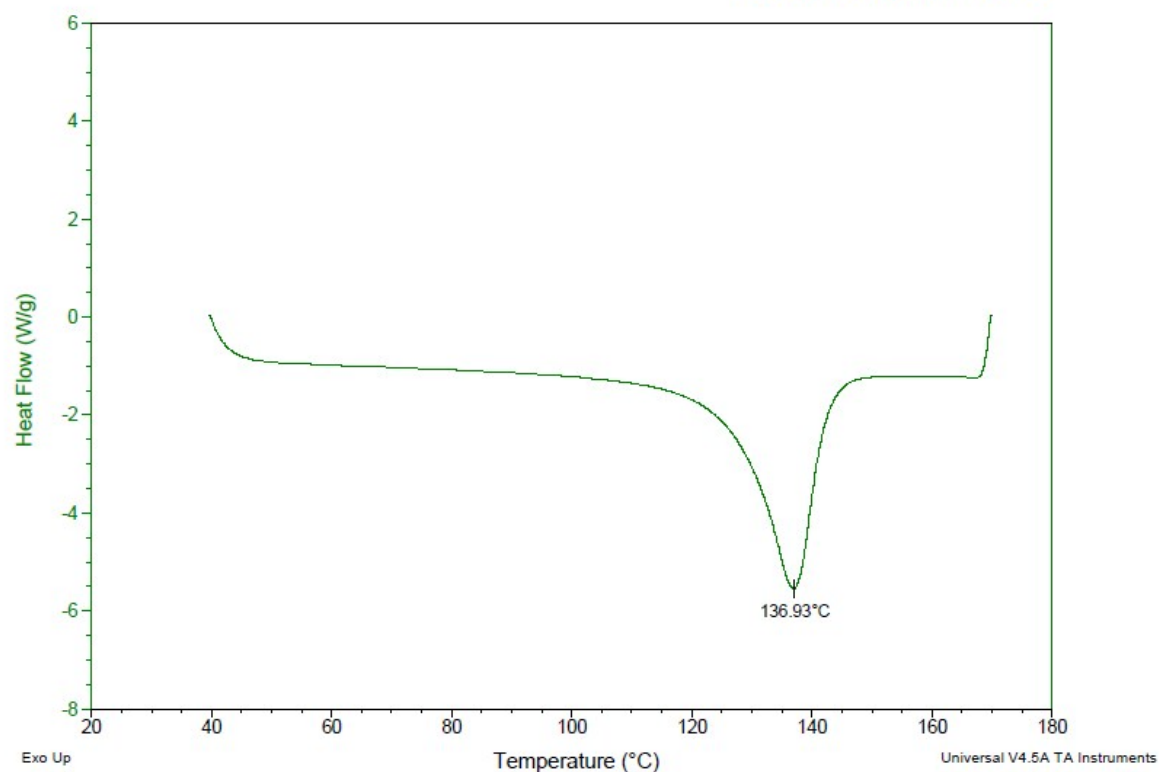

**Figure S38.** DSC of the copolymer from table 1, entry 6.

Sample: NYN-1018-A2  
Size: 4.9000 mg  
Method: Ramp

DSC

File: D:\DSC DATA\NYNNYN-1018-A2.001

Run Date: 25-Aug-2016 20:02  
Instrument: DSC Q20 V24.11 Build 124

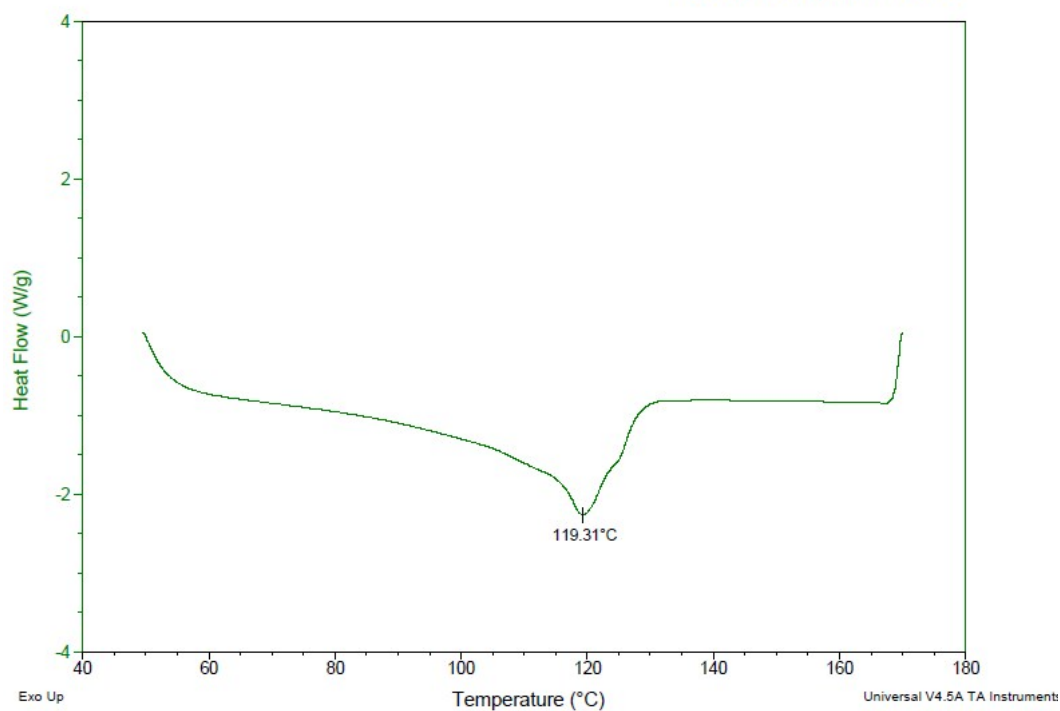

**Figure S39.** DSC of the copolymer from table 1, entry 7.

Sample: NYN-1044-B  
Size: 4.7000 mg  
Method: Ramp

DSC

File: D:\DSC DATA\NYNNYN-1044-B.001

Run Date: 30-Aug-2016 15:41  
Instrument: DSC Q20 V24.11 Build 124

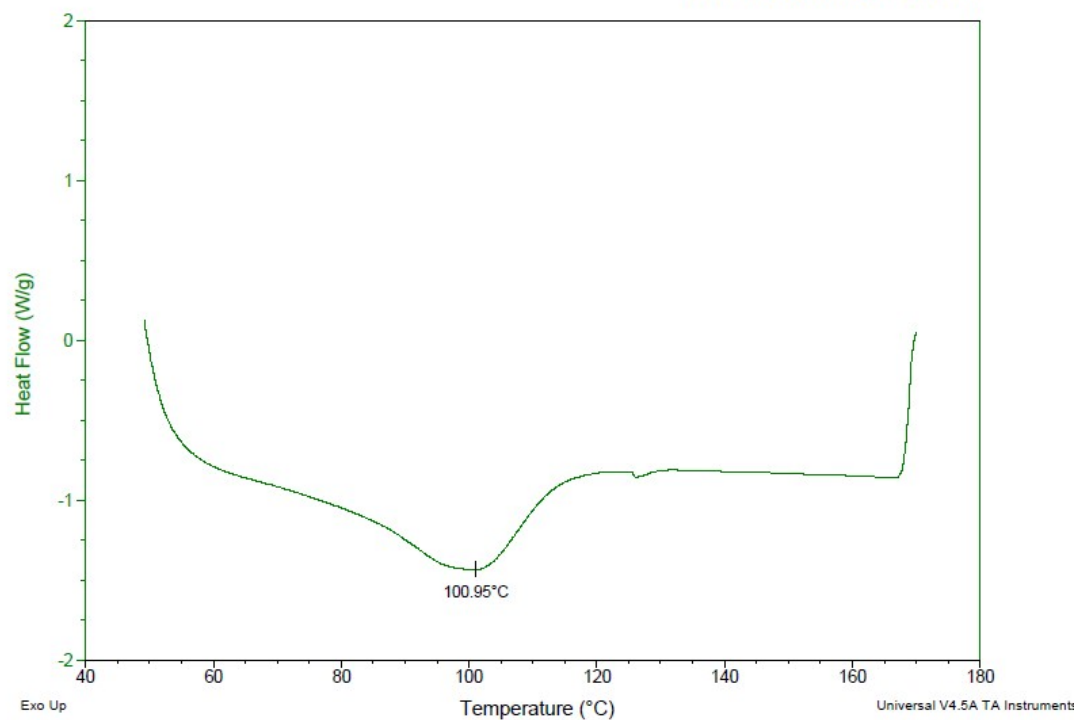

**Figure S40.** DSC of the copolymer from table 1, entry 8.

Sample: NYN-1017-C  
Size: 5.4000 mg  
Method: Ramp

DSC

File: D:\DSC DATA\NYNNYN-1017-C.001

Run Date: 29-Aug-2016 09:25  
Instrument: DSC Q20 V24.11 Build 124

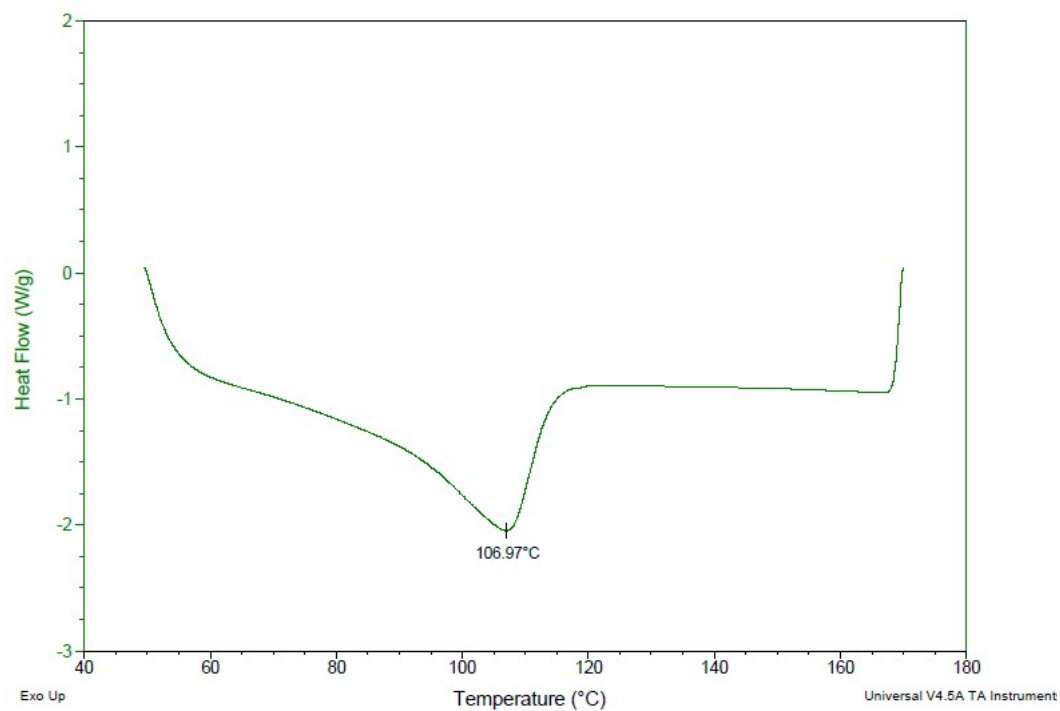

**Figure S41.** DSC of the copolymer from table 1, entry 9.

Sample: nyn-1034-c-20170214  
Size: 7.5000 mg

DSC

File: E:\NNPD\nyn-1034-c-20170214.txt  
Operator: ding  
Run Date: 15-Feb-2017 03:36  
Instrument: DSC Q2000 V24.10 Build 122

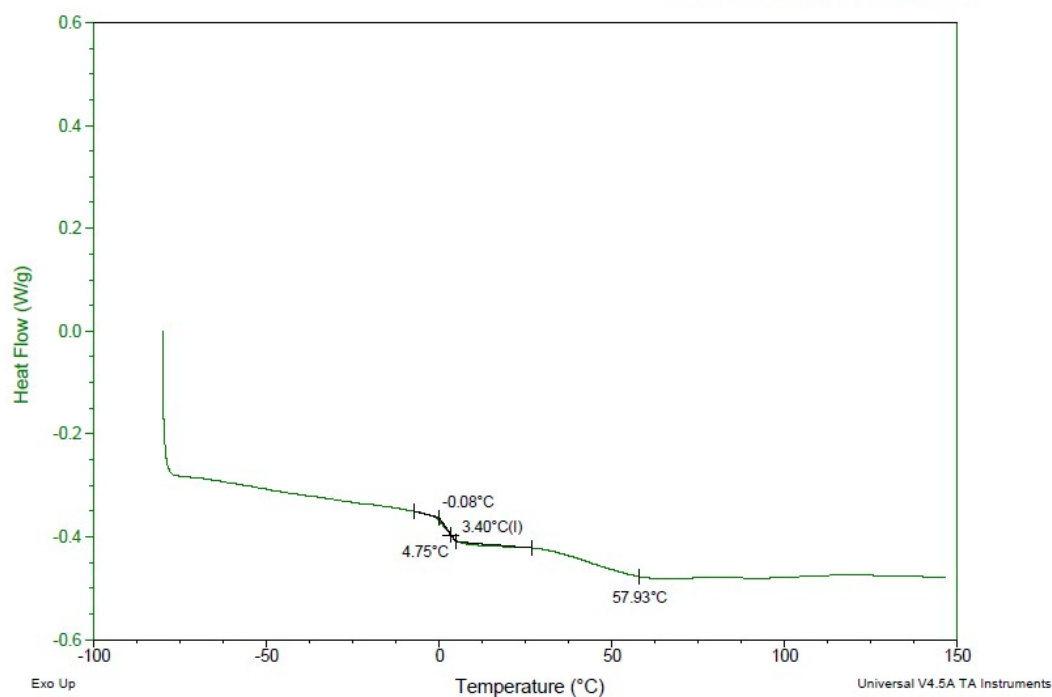

**Figure S42.** DSC of the copolymer from table 1, entry 10.

Sample: NYN-1017-2  
Size: 4.2000 mg  
Method: Ramp

DSC

File: D:\DSC DATA\NYN\NYN-1017-2.001  
Run Date: 29-Aug-2016 16:21  
Instrument: DSC Q20 V24.11 Build 124

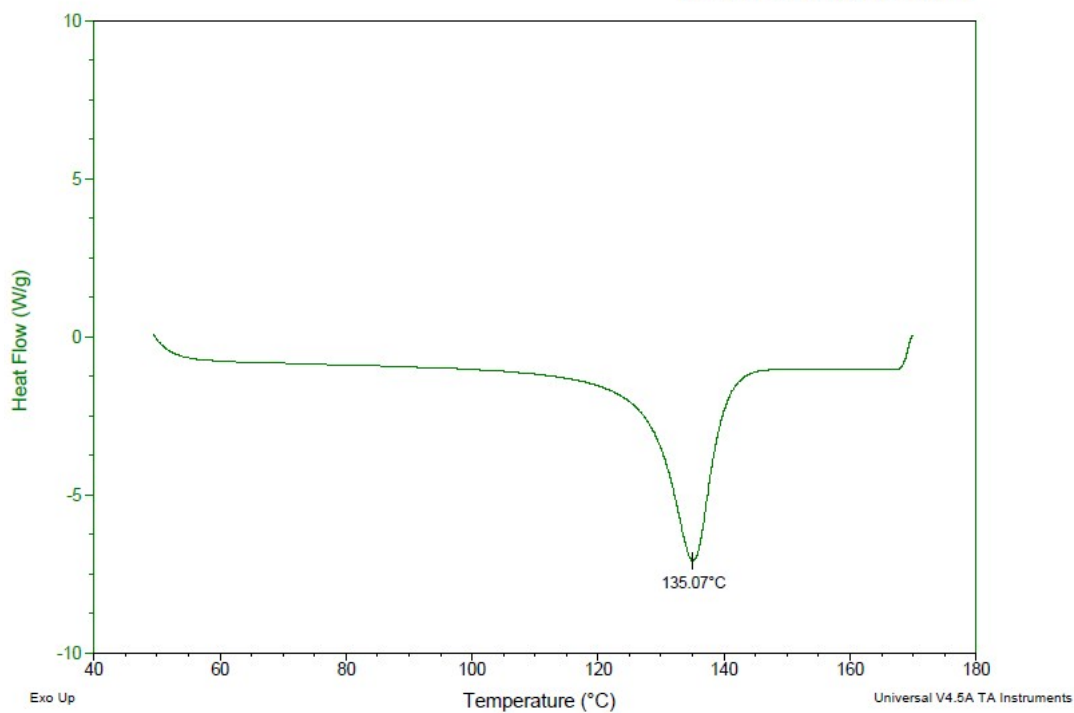

**Figure S43.** DSC of the copolymer from table 1, entry 11.

Sample: NYN-1044-4  
Size: 4.3000 mg  
Method: Ramp

DSC

File: D:\DSC DATA\NYNNYN-1044-4.001

Run Date: 29-Aug-2016 13:13  
Instrument: DSC Q20 V24.11 Build 124

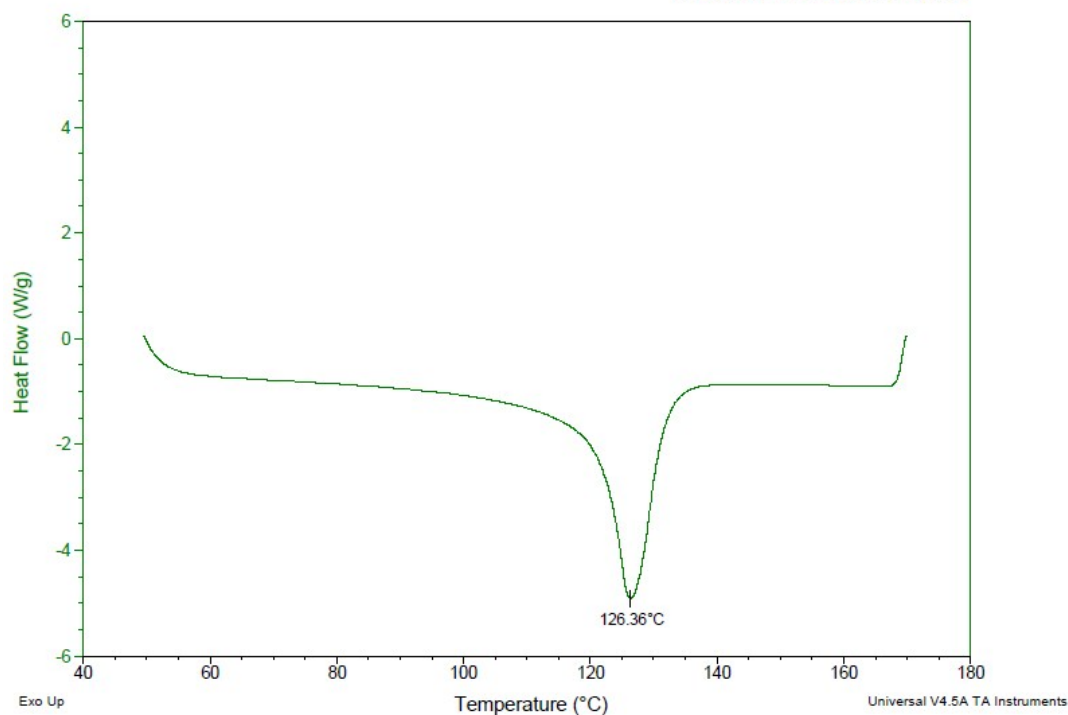

**Figure S44.** DSC of the copolymer from table 1, entry12.

Sample: NYN-1036-B  
Size: 5.2000 mg  
Method: Ramp

DSC

File: D:\DSC DATA\NYNNYN-1036-B.001

Run Date: 26-Aug-2016 13:20  
Instrument: DSC Q20 V24.11 Build 124

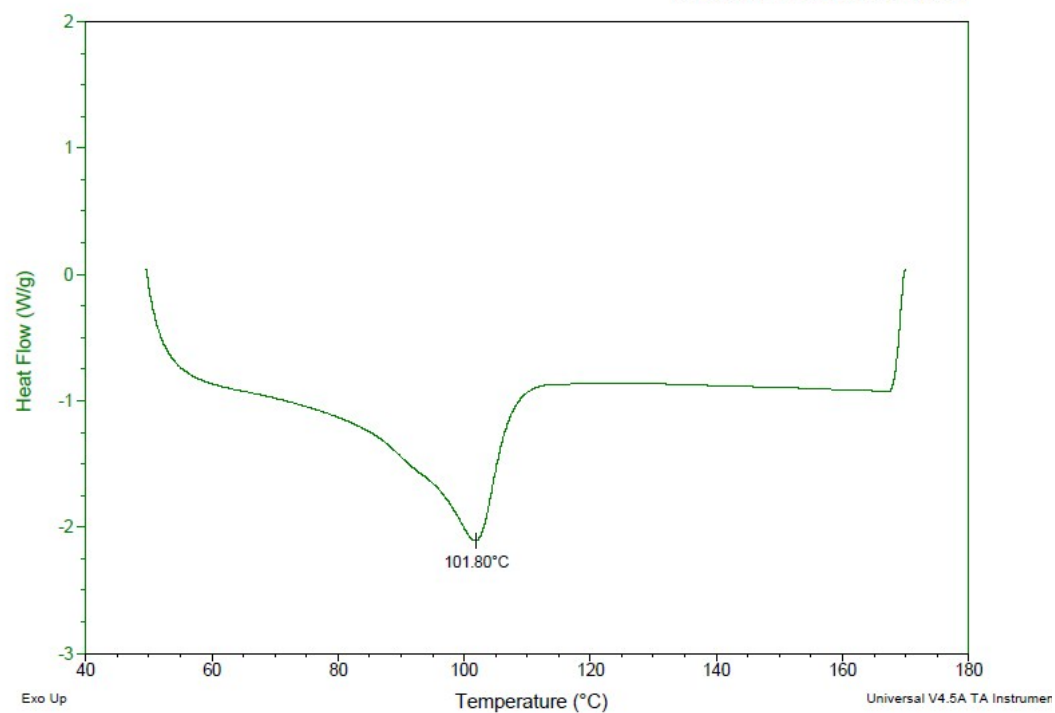

**Figure S45.** DSC of the copolymer from table 2, entry1.

Sample: NYN-1034-A  
Size: 5.0000 mg  
Method: Ramp

DSC

File: D:\DSC DATA\NYN\NYN-1034-A.001

Run Date: 29-Aug-2016 11:46  
Instrument: DSC Q20 V24.11 Build 124

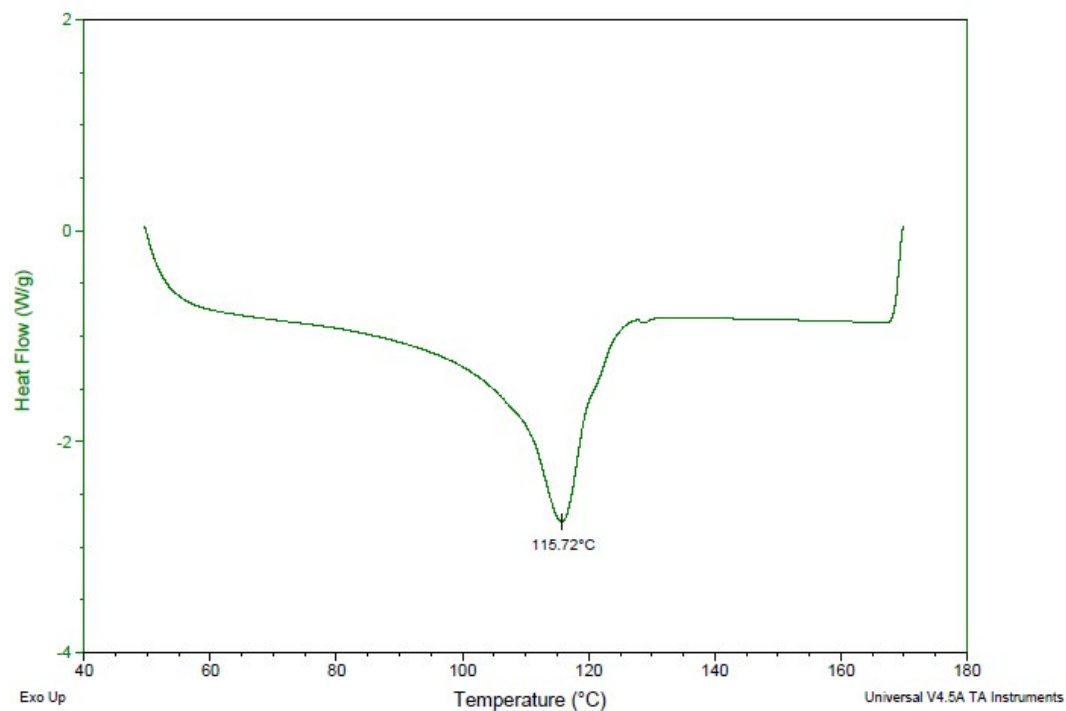

**Figure S46.** DSC of the copolymer from table 2, entry 2.

Sample: NYN-1043-C  
Size: 4.6000 mg  
Method: Ramp

DSC

File: D:\DSC DATA\NYN\NYN-1043-C.001

Run Date: 30-Aug-2016 17:24  
Instrument: DSC Q20 V24.11 Build 124

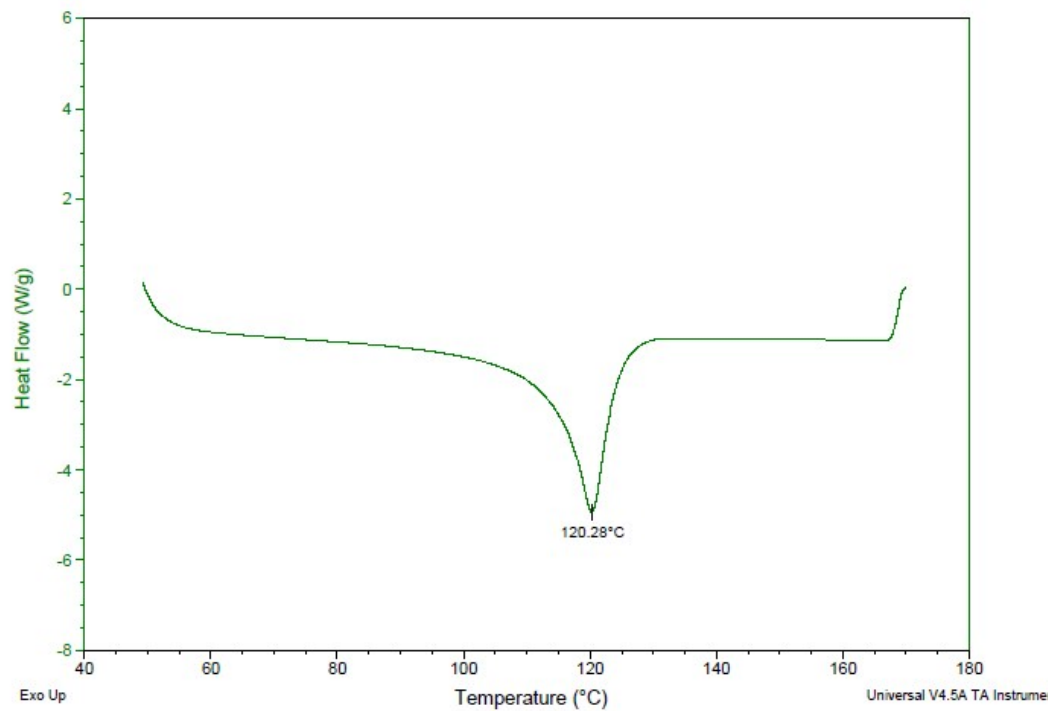

**Figure S47.** DSC of the copolymer from table 2, entry 3.

Sample: NYN-1076-5  
Size: 5.0000 mg  
Method: Ramp

DSC

File: D:\DSC DATA\NYN-DSC\NYN-1076-5.001

Run Date: 20-Oct-2016 14:05  
Instrument: DSC Q20 V24.11 Build 124

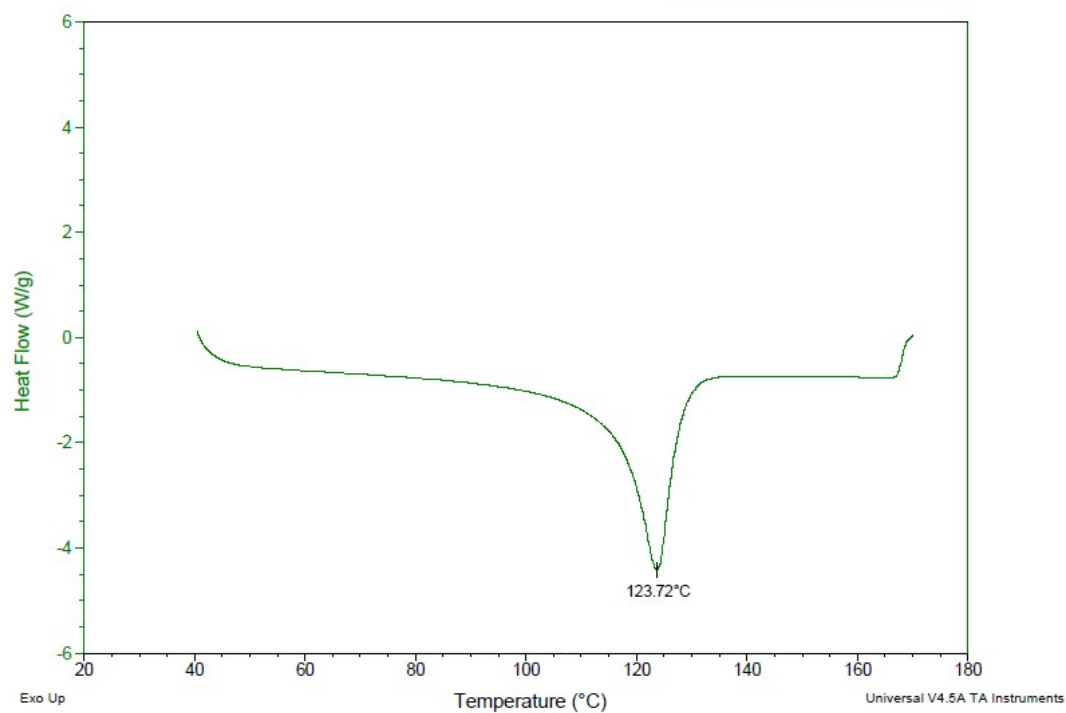

**Figure S48.** DSC of the copolymer from table 2, entry 4.

Sample: nyn-1059-6-20170214  
Size: 3.7800 mg

DSC

File: E:\NNPD\nyn-1059-6-20170214.txt  
Operator: ding  
Run Date: 15-Feb-2017 10:15  
Instrument: DSC Q2000 V24.10 Build 122

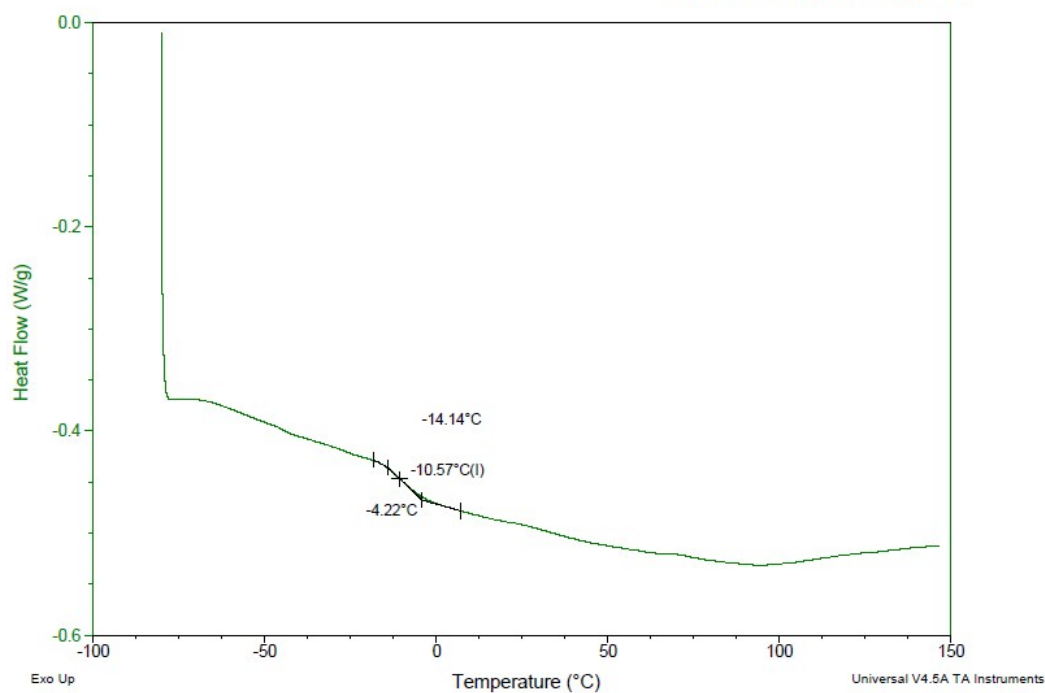

**Figure S49.** DSC of the copolymer from table 2, entry 5.

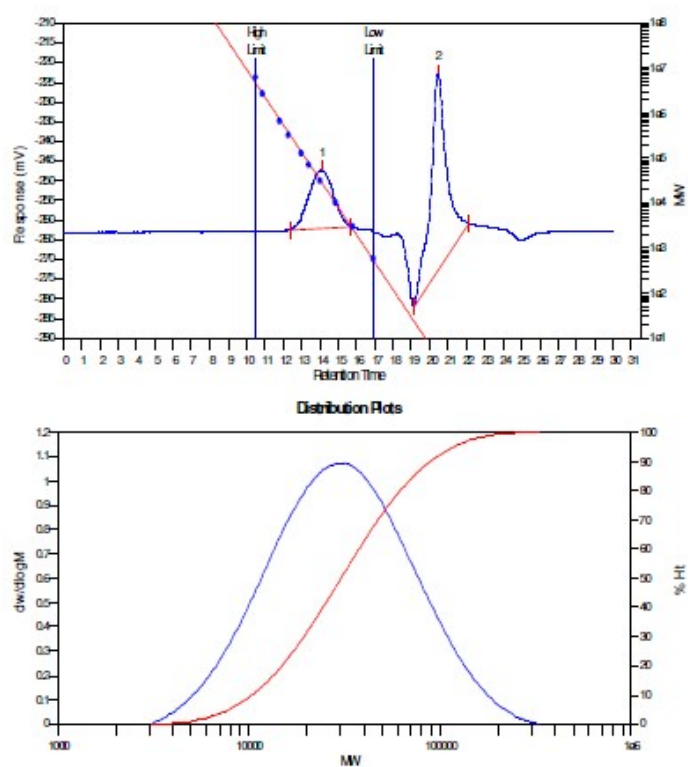

#### MW Averages

| Peak No | Mp    | Mn    | Mw    | Mz    | Mz+1   | Mv    | PD      |
|---------|-------|-------|-------|-------|--------|-------|---------|
| 1       | 28765 | 21699 | 41697 | 74961 | 115217 | 37872 | 1.92161 |
| 2       | 3     | 2     | 4     | 6     | 9      | 4     | 2       |

#### Processed Peaks

| Peak No | Name | Start RT (mins) | Max RT (mins) | End RT (mins) | Pk Height (mV) | % Height | Area (mV.secs) | % Area  |
|---------|------|-----------------|---------------|---------------|----------------|----------|----------------|---------|
| 1       |      | 12.37           | 14.10         | 15.68         | 14.7904        | 22.85    | 1350.13        | 30.8293 |
| 2       |      | 19.15           | 20.43         | 22.12         | 49.9378        | 77.15    | 3029.24        | 69.1707 |

**Figure S50.** GPC of the copolymer from table 1, entry 2.

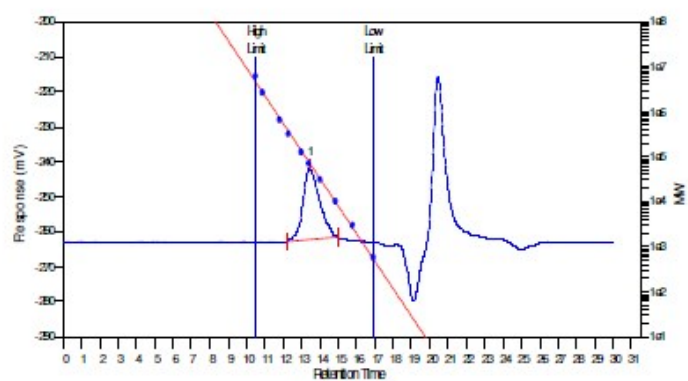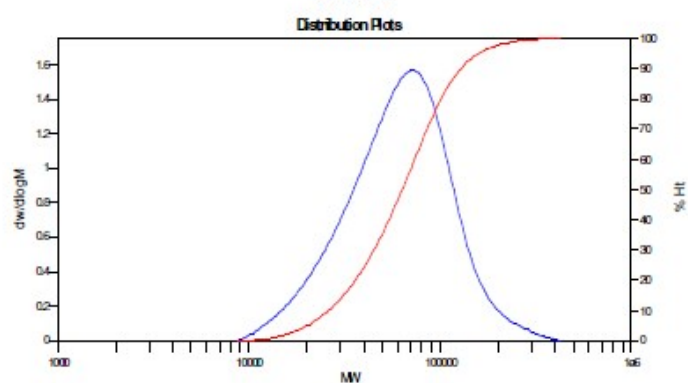

#### MW Averages

| Peak No | Mp    | Mn    | Mw    | Mz     | Mz+1   | Mv    | PD      |
|---------|-------|-------|-------|--------|--------|-------|---------|
| 1       | 70268 | 49005 | 72088 | 101829 | 139719 | 68293 | 1.47103 |

#### Processed Peaks

| Peak No | Name | Start RT (mins) | Max RT (mins) | End RT (mins) | Pk Height (mV) | % Height | Area (mV.secs) | % Area |
|---------|------|-----------------|---------------|---------------|----------------|----------|----------------|--------|
| 1       |      | 12.18           | 13.47         | 14.95         | 20.2101        | 0        | 1266.1         | 100    |

**Figure S51.** GPC of the copolymer from table 1, entry 3.



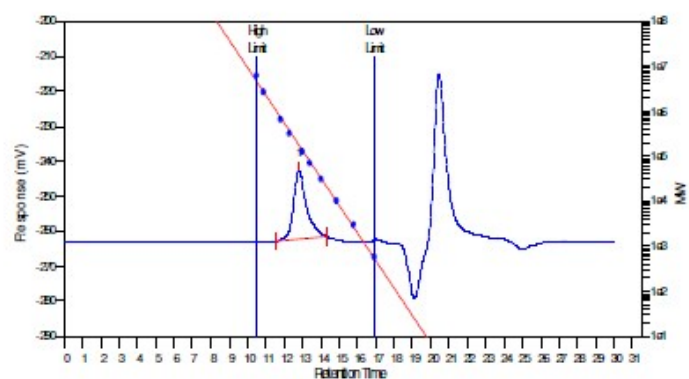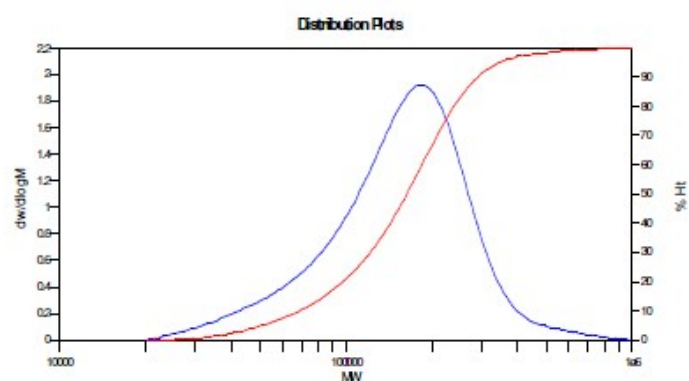

#### MW Averages

| Peak No | Mp     | Mn     | Mw     | Mz     | Mz+1   | Mv     | PD      |
|---------|--------|--------|--------|--------|--------|--------|---------|
| 1       | 184194 | 125242 | 175107 | 231389 | 305124 | 167618 | 1.39815 |

#### Processed Peaks

| Peak No | Name | Start RT (mins) | Max RT (mins) | End RT (mins) | Pk Height (mV) | % Height | Area (mV.secs) | % Area |
|---------|------|-----------------|---------------|---------------|----------------|----------|----------------|--------|
| 1       |      | 11.58           | 12.78         | 14.35         | 19.731         | 0        | 1004.8         | 100    |

**Figure S52.** GPC of the copolymer from table 1, entry 4.

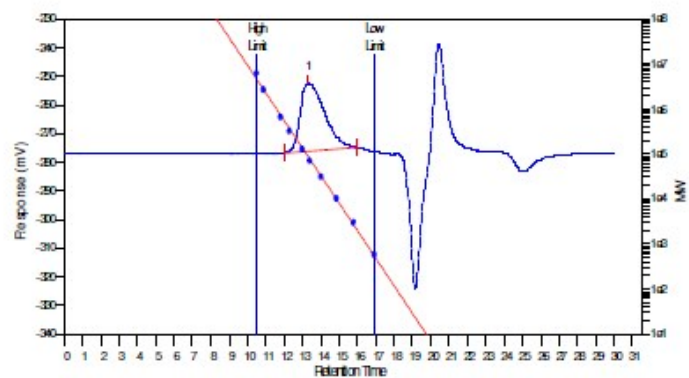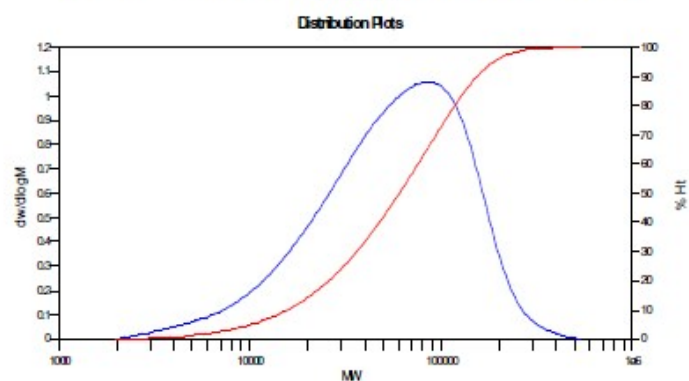

#### MW Averages

| Peak No | Mp    | Mn    | Mw    | Mz     | Mz+1   | Mv    | PD      |
|---------|-------|-------|-------|--------|--------|-------|---------|
| 1       | 86822 | 33213 | 74870 | 122070 | 169604 | 68468 | 2.25424 |

#### Processed Peaks

| Peak No | Name | Start RT (mins) | Max RT (mins) | End RT (mins) | Pk Height (mV) | % Height | Area (mV.secs) | % Area |
|---------|------|-----------------|---------------|---------------|----------------|----------|----------------|--------|
| 1       |      | 12.03           | 13.32         | 16.00         | 23.6304        | 100      | 2191.93        | 100    |

**Figure S53.** GPC of the copolymer from table 1, entry 5.

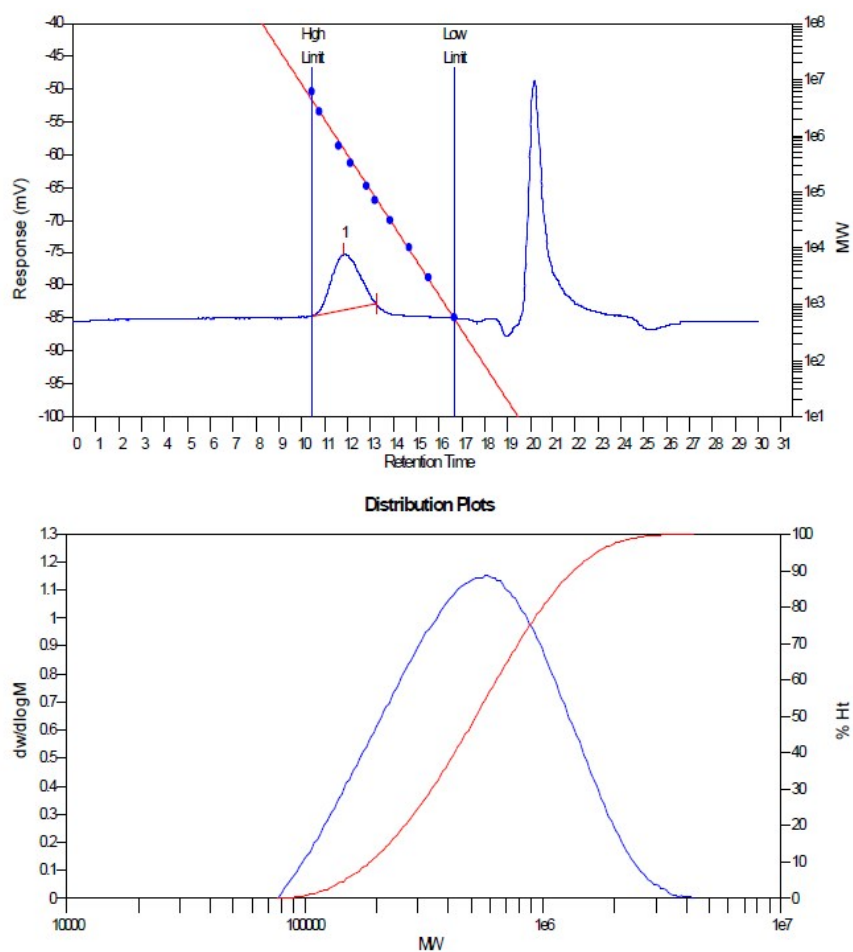

#### MW Averages

| Peak No | Mp     | Mn     | Mw     | Mz      | Mz+1    | Mv     | PD      |
|---------|--------|--------|--------|---------|---------|--------|---------|
| 1       | 586216 | 387756 | 662312 | 1047450 | 1466420 | 613565 | 1.70806 |

#### Processed Peaks

| Peak No | Name | Start RT (mins) | Max RT (mins) | End RT (mins) | Pk Height (mV) | % Height | Area (mV.secs) | % Area |
|---------|------|-----------------|---------------|---------------|----------------|----------|----------------|--------|
| 1       |      | 10.45           | 11.85         | 13.25         | 8.5807         | 100      | 717.15         | 100    |

**Figure S54.** GPC of the copolymer from table 1, entry 6.

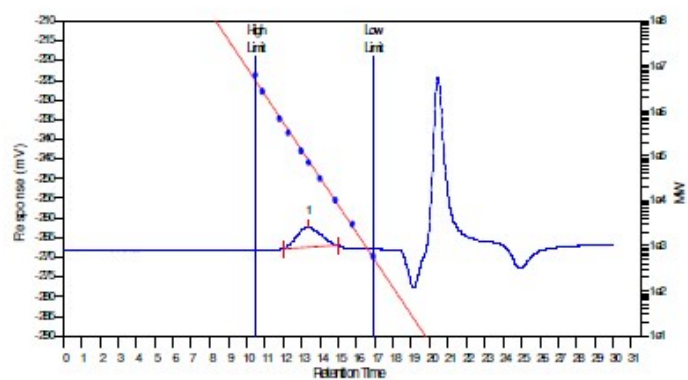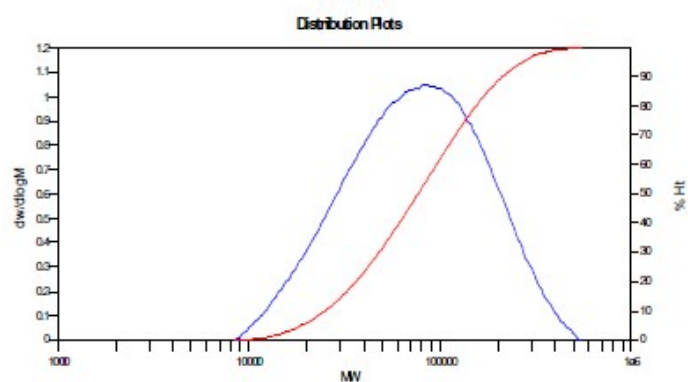

#### MW Averages

| Peak No | Mp    | Mn    | Mw    | Mz     | Mz+1   | Mv    | PD      |
|---------|-------|-------|-------|--------|--------|-------|---------|
| 1       | 80911 | 53447 | 99646 | 163199 | 226445 | 91478 | 1.86439 |

#### Processed Peaks

| Peak No | Name | Start RT (mins) | Max RT (mins) | End RT (mins) | Pk Height (mV) | % Height | Area (mV.secs) | % Area |
|---------|------|-----------------|---------------|---------------|----------------|----------|----------------|--------|
| 1       |      | 12.02           | 13.37         | 14.97         | 4.83274        | 0        | 452.006        | 100    |

**Figure S55.** GPC of the copolymer from table 1, entry 7.

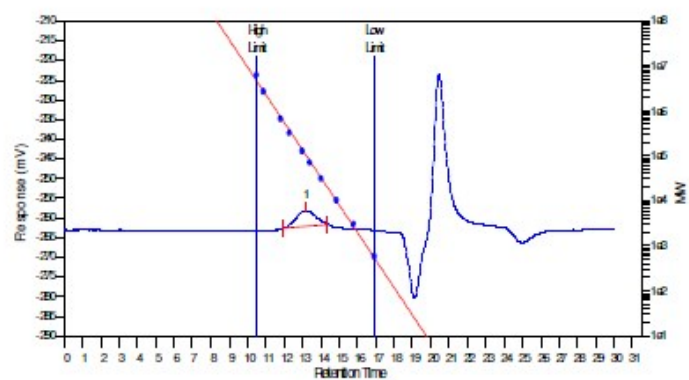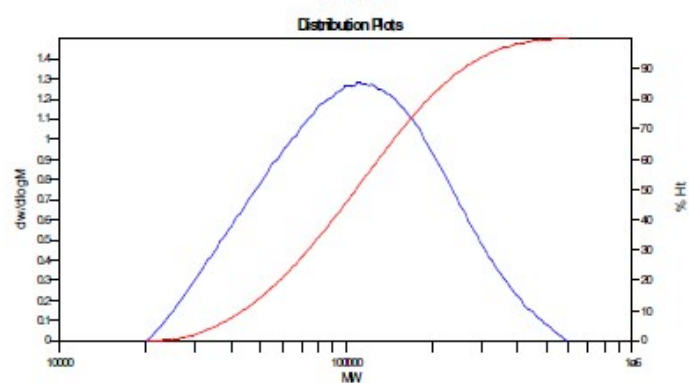

#### MW Averages

| Peak No | Mp     | Mn    | Mw     | Mz     | Mz+1   | Mv     | PD      |
|---------|--------|-------|--------|--------|--------|--------|---------|
| 1       | 109826 | 85570 | 131501 | 192378 | 255985 | 123540 | 1.53677 |

#### Processed Peaks

| Peak No | Name | Start RT (mins) | Max RT (mins) | End RT (mins) | Pk Height (mV) | % Height | Area (mV.secs) | % Area |
|---------|------|-----------------|---------------|---------------|----------------|----------|----------------|--------|
| 1       |      | 11.95           | 13.15         | 14.35         | 3.94218        | 0        | 301.524        | 100    |

**Figure S56.** GPC of the copolymer from table 1, entry 8.

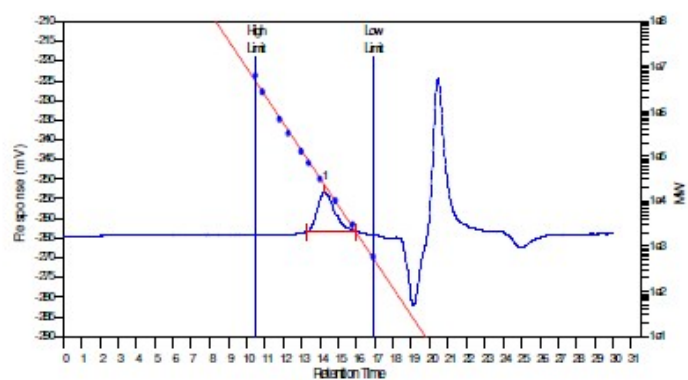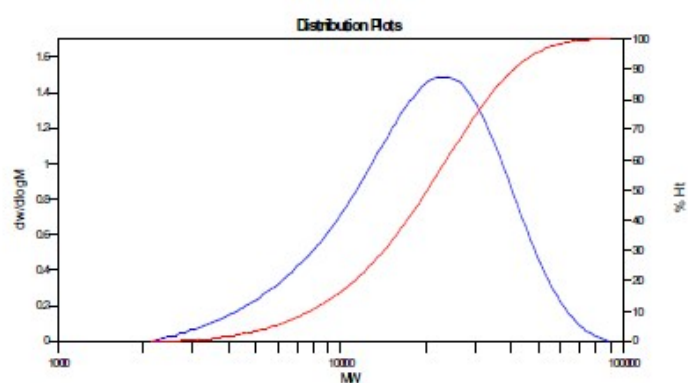

#### MW Averages

| Peak No | Mp    | Mn    | Mw    | Mz    | Mz+1  | Mv    | PD      |
|---------|-------|-------|-------|-------|-------|-------|---------|
| 1       | 23280 | 14918 | 22464 | 30194 | 37407 | 21346 | 1.50583 |

#### Processed Peaks

| Peak No | Name | Start RT (mins) | Max RT (mins) | End RT (mins) | Pk Height (mV) | % Height | Area (mV.secs) | % Area |
|---------|------|-----------------|---------------|---------------|----------------|----------|----------------|--------|
| 1       |      | 13.30           | 14.25         | 15.93         | 9.98112        | 0        | 657.906        | 100    |

**Figure S57.** GPC of the copolymer from table 1, entry 9.

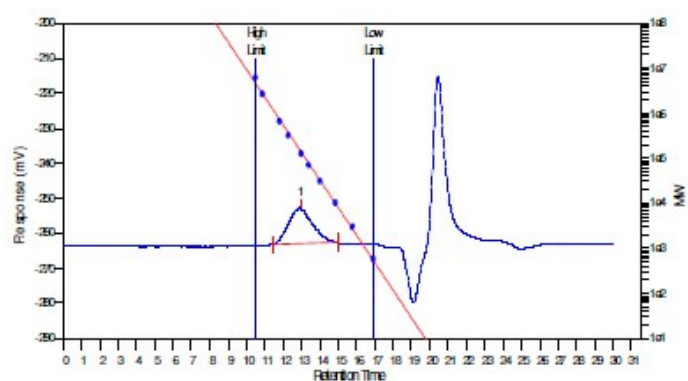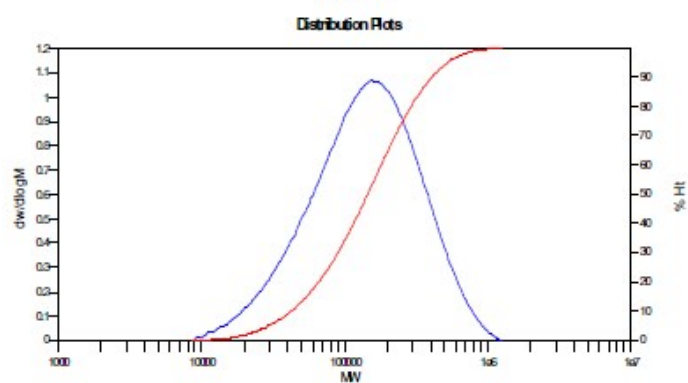

#### MW Averages

| Peak No | Mp     | Mn    | Mw     | Mz     | Mz+1   | Mv     | PD      |
|---------|--------|-------|--------|--------|--------|--------|---------|
| 1       | 152621 | 91276 | 189657 | 325006 | 468168 | 172660 | 2.07784 |

#### Processed Peaks

| Peak No | Name | Start RT (mins) | Max RT (mins) | End RT (mins) | Pk Height (mV) | % Height | Area (mV.secs) | % Area |
|---------|------|-----------------|---------------|---------------|----------------|----------|----------------|--------|
| 1       |      | 11.43           | 12.92         | 14.95         | 10.1055        | 0        | 927.895        | 100    |

**Figure S58.** GPC of the copolymer from table 1, entry 10.

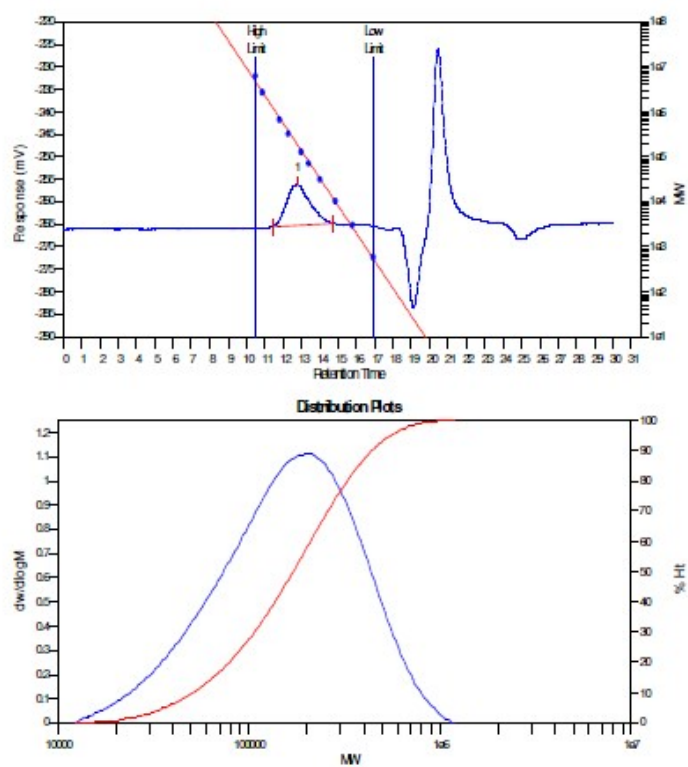

#### MW Averages

| Peak No | Mp     | Mn     | Mw     | Mz     | Mz+1   | Mv     | PD      |
|---------|--------|--------|--------|--------|--------|--------|---------|
| 1       | 202352 | 109629 | 211996 | 338894 | 463722 | 195134 | 1.93376 |

#### Processed Peaks

| Peak No | Name | Start RT (mins) | Max RT (mins) | End RT (mins) | Pk Height (mV) | % Height | Area (mV.secs) | % Area |
|---------|------|-----------------|---------------|---------------|----------------|----------|----------------|--------|
| 1       |      | 11.47           | 12.73         | 14.70         | 9.04033        | 0        | 796.653        | 100    |

Figure S59. GPC of the copolymer from table 1, entry 11.



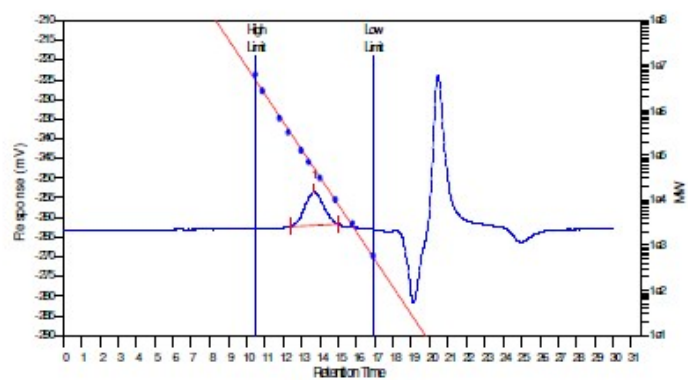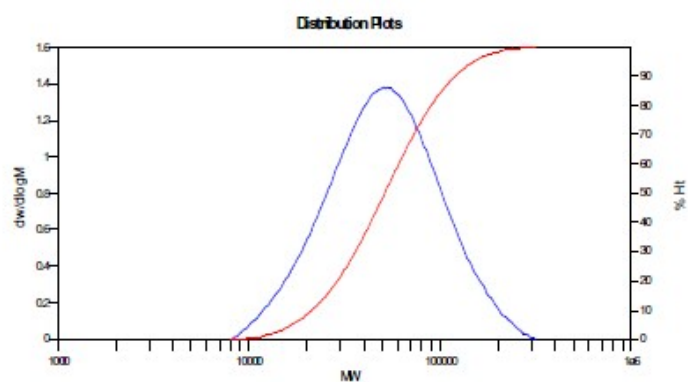

#### MW Averages

| Peak No | Mp    | Mn    | Mw    | Mz    | Mz+1   | Mv    | PD      |
|---------|-------|-------|-------|-------|--------|-------|---------|
| 1       | 50565 | 40655 | 61977 | 90973 | 123800 | 58282 | 1.52446 |

#### Processed Peaks

| Peak No | Name | Start RT (mins) | Max RT (mins) | End RT (mins) | Pk Height (mV) | % Height | Area (mV.secs) | % Area |
|---------|------|-----------------|---------------|---------------|----------------|----------|----------------|--------|
| 1       |      | 12.40           | 13.70         | 15.00         | 8.41446        | 0        | 597.934        | 100    |

**Figure S60.** GPC of the copolymer from table 1, entry 12.

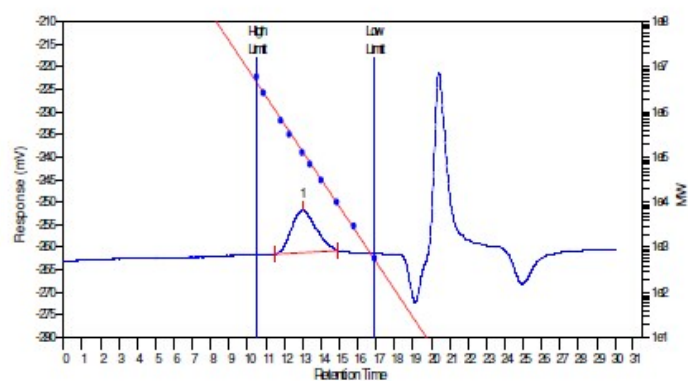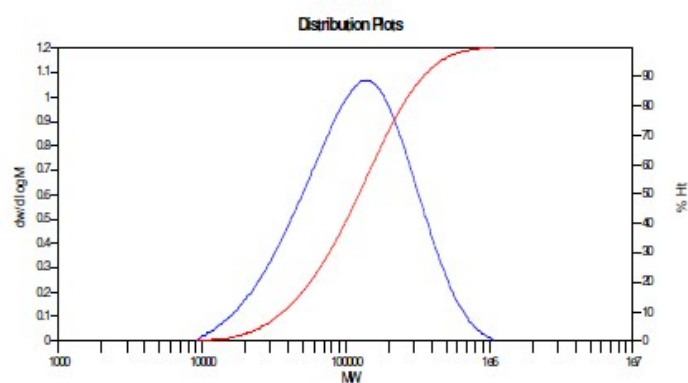

#### MW Averages

| Peak No | Mp     | Mn    | Mw     | Mz     | Mz+1   | Mv     | PD      |
|---------|--------|-------|--------|--------|--------|--------|---------|
| 1       | 138926 | 79779 | 161264 | 276165 | 400500 | 146963 | 2.02138 |

#### Processed Peaks

| Peak No | Name | Start RT (mins) | Max RT (mins) | End RT (mins) | Pk Height (mV) | % Height | Area (mV.secs) | % Area |
|---------|------|-----------------|---------------|---------------|----------------|----------|----------------|--------|
| 1       |      | 11.53           | 13.00         | 14.92         | 9.34034        | 0        | 858.342        | 100    |

**Figure S61.** GPC of the copolymer from table 2, entry 1.

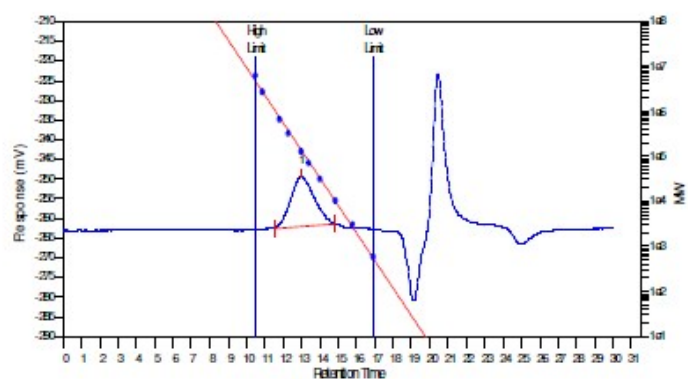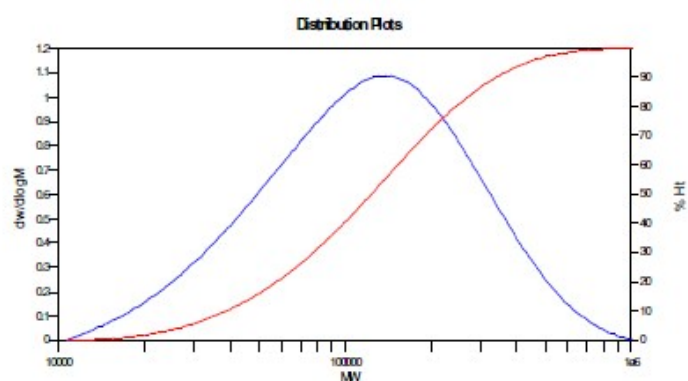

#### MW Averages

| Peak No | Mp     | Mn    | Mw     | Mz     | Mz+1   | Mv     | PD      |
|---------|--------|-------|--------|--------|--------|--------|---------|
| 1       | 135699 | 82706 | 160282 | 268305 | 383513 | 146695 | 1.93797 |

#### Processed Peaks

| Peak No | Name | Start RT (mins) | Max RT (mins) | End RT (mins) | Pk Height (mV) | % Height | Area (mV.secs) | % Area |
|---------|------|-----------------|---------------|---------------|----------------|----------|----------------|--------|
| 1       |      | 11.57           | 13.00         | 14.80         | 12.5774        | 0        | 1133.03        | 100    |

**Figure S62.** GPC of the copolymer from table 2, entry 2.

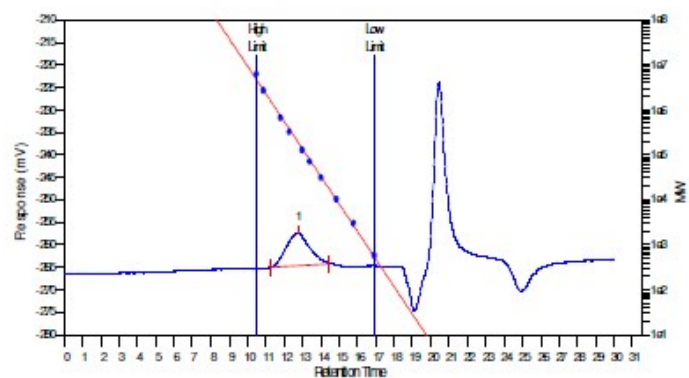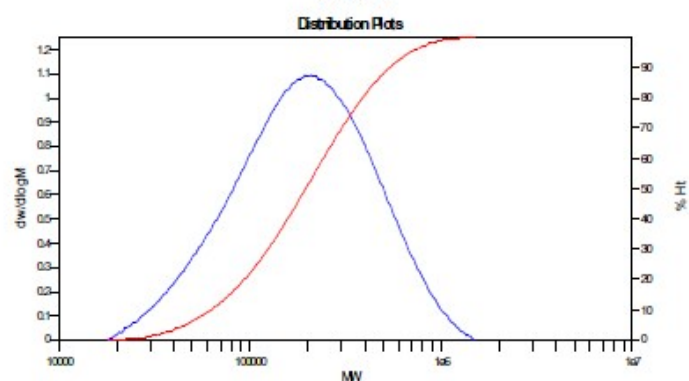

#### MW Averages

| Peak No | Mp     | Mn     | Mw     | Mz     | Mz+1   | Mv     | PD      |
|---------|--------|--------|--------|--------|--------|--------|---------|
| 1       | 193060 | 133490 | 254051 | 421688 | 596768 | 232870 | 1.90315 |

#### Processed Peaks

| Peak No | Name | Start RT (mins) | Max RT (mins) | End RT (mins) | Pk Height (mV) | % Height | Area (mV.secs) | % Area |
|---------|------|-----------------|---------------|---------------|----------------|----------|----------------|--------|
| 1       |      | 11.30           | 12.75         | 14.43         | 7.05893        | 0        | 632.549        | 100    |

**Figure S63.** GPC of the copolymer from table 2, entry 3.

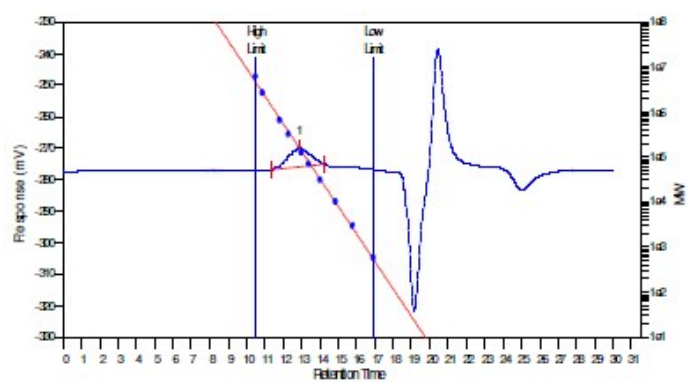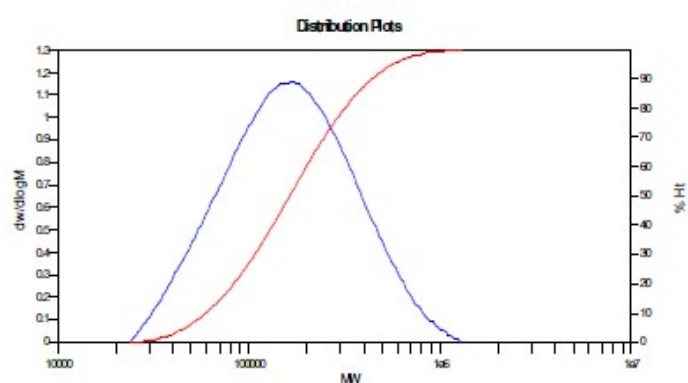

#### MW Averages

| Peak No | Mp     | Mn     | Mw     | Mz     | Mz+1   | Mv     | PD      |
|---------|--------|--------|--------|--------|--------|--------|---------|
| 1       | 163771 | 122186 | 211674 | 346554 | 499375 | 195231 | 1.73239 |

#### Processed Peaks

| Peak No | Name | Start RT (mins) | Max RT (mins) | End RT (mins) | Pk Height (mV) | % Height | Area (mV.secs) | % Area |
|---------|------|-----------------|---------------|---------------|----------------|----------|----------------|--------|
| 1       |      | 11.40           | 12.87         | 14.23         | 5.86276        | 100      | 495.543        | 100    |

**Figure S64.** GPC of the copolymer from table 2, entry 4.

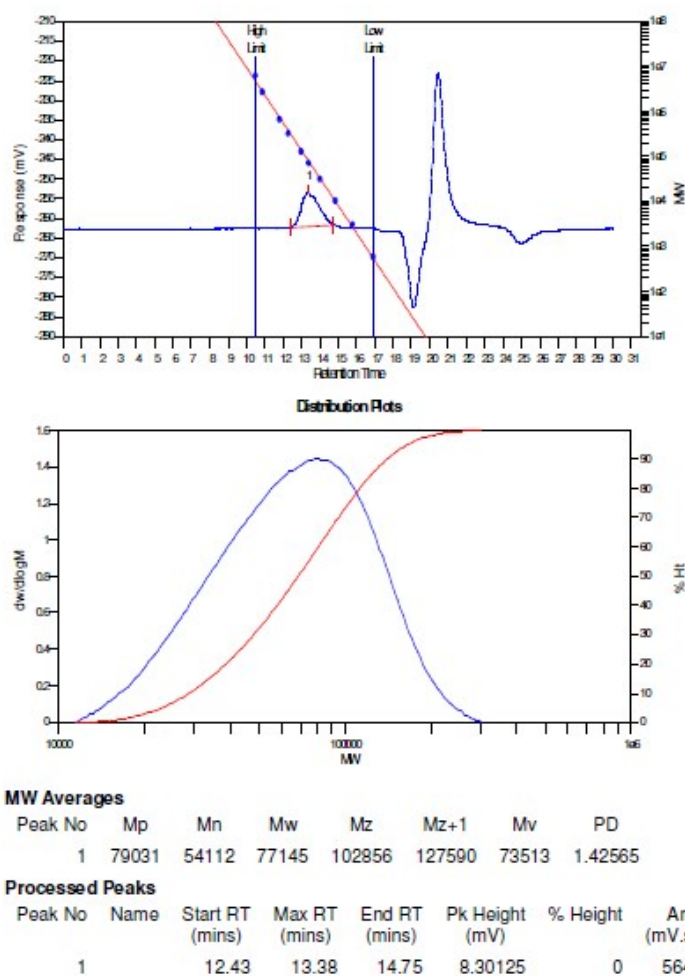

**Figure S65.** GPC of the copolymer from table 2, entry 5.

### 3. References

P. Perrotin, J. S. J. McCahill, G. Wu and S. L. Scott, *Chem. Commun.*, 2011, **47**, 6948.
